# Supplementary material for: The Tetraodon nigroviridis reference transcriptome: developmental transition, length retention and microsynteny of long non-coding RNAs in a compact vertebrate genome
Source: PubMed Central journal article supplement (PMC5024134; doi:10.1038/srep33210), 2016-09-15
Supplement: srep33210-s1.pdf [file srep33210-s1.pdf]

## Supplementary Figures and Legends

### **The *Tetraodon nigroviridis* reference transcriptome: developmental transition, length retention and microsynteny of long non-coding RNAs in a compact vertebrate genome**

Swaraj Basu<sup>1,5</sup>, Yavor Hadzhiev<sup>2</sup>, Giuseppe Petrosino<sup>1</sup>, Chirag Nepal<sup>4</sup>, Jochen Gehrig<sup>3</sup>, Olivier Armant<sup>3</sup>, Marco Ferg<sup>3</sup>, Uwe Strahle<sup>3</sup>, Remo Sanges<sup>1\*</sup> and Ferenc Müller<sup>2\*</sup>

1. Biology and Evolution of Marine Organisms, Stazione Zoologica Anton Dohrn, Villa Comunale, Naples - 80121, Italy.

2. Institute of Cancer and Genomic Sciences, College of Medical and Dental Sciences, University of Birmingham, Edgbaston, Birmingham, B15 2TT, UK.

3. Karlsruhe Institute of Technology (KIT), Campus North, Institute of Toxicology and Genetics (ITG), Hermann-von-Helmholtz-Platz 1, 76344 Eggenstein-Leopoldshafen, Germany.

4. BRIC - Biotech Research & Innovation Centre, University of Copenhagen, Ole Maaløes Vej 5, DK-2200 Copenhagen N, Denmark.

5. Present address: Department of Medical Biochemistry and Cell Biology, Institute of Biomedicine, Sahlgrenska Academy, University of Gothenburg, 405 30 Gothenburg, Sweden.

\* Correspondence to be addressed to: [f.mueller@bham.ac.uk](mailto:f.mueller@bham.ac.uk) and [remo.sanges@gmail.com](mailto:remo.sanges@gmail.com)

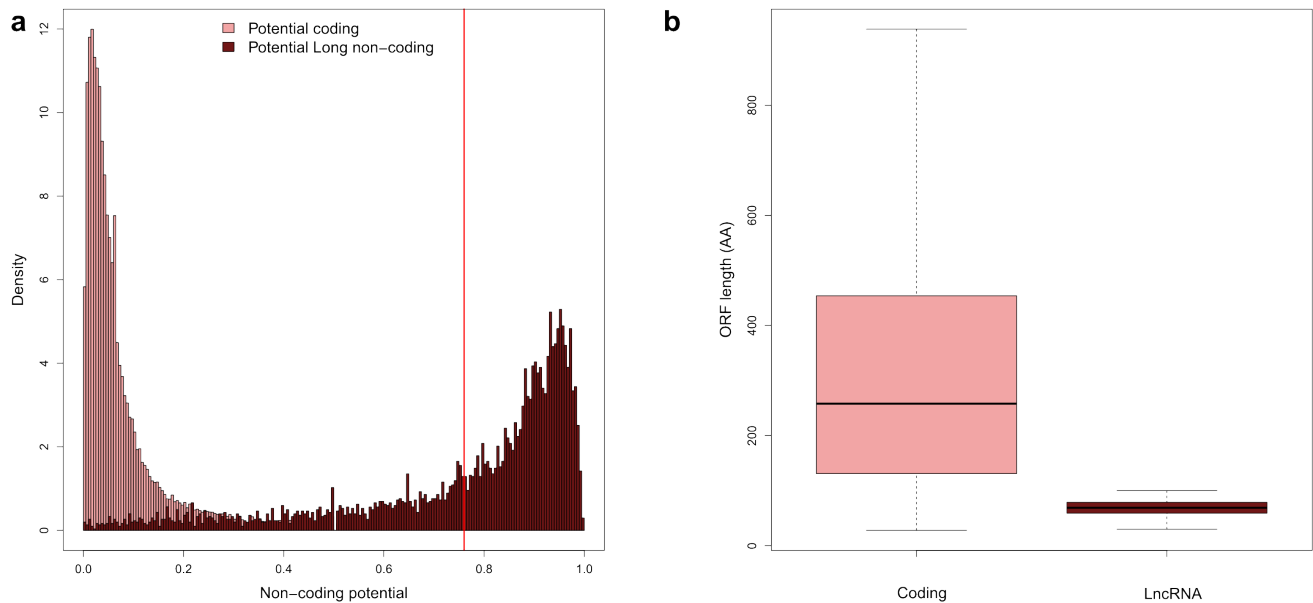

**Supplementary figure S1. Distribution of non coding potential scores and ORF length for the assembled transcripts.** **a)** Distribution of non-coding potential score for coding transcripts and potential long non-coding transcripts (without annotation and ORF  $\leq 100$  AA). The y axis represents the frequency, the bars in pink represent coding transcripts while the green bars represent the potential lncRNAs (transcripts without any annotation and an ORF  $< 100$  AA). The red line marks the chosen cut-off non-coding potential score (0.76) for a potential lncRNA to be placed in the lncRNA dataset. **b)** Distribution of ORF length for coding and lncRNA transcripts (final lncRNA set post filtering with a non-coding potential score  $> 0.76$ ).

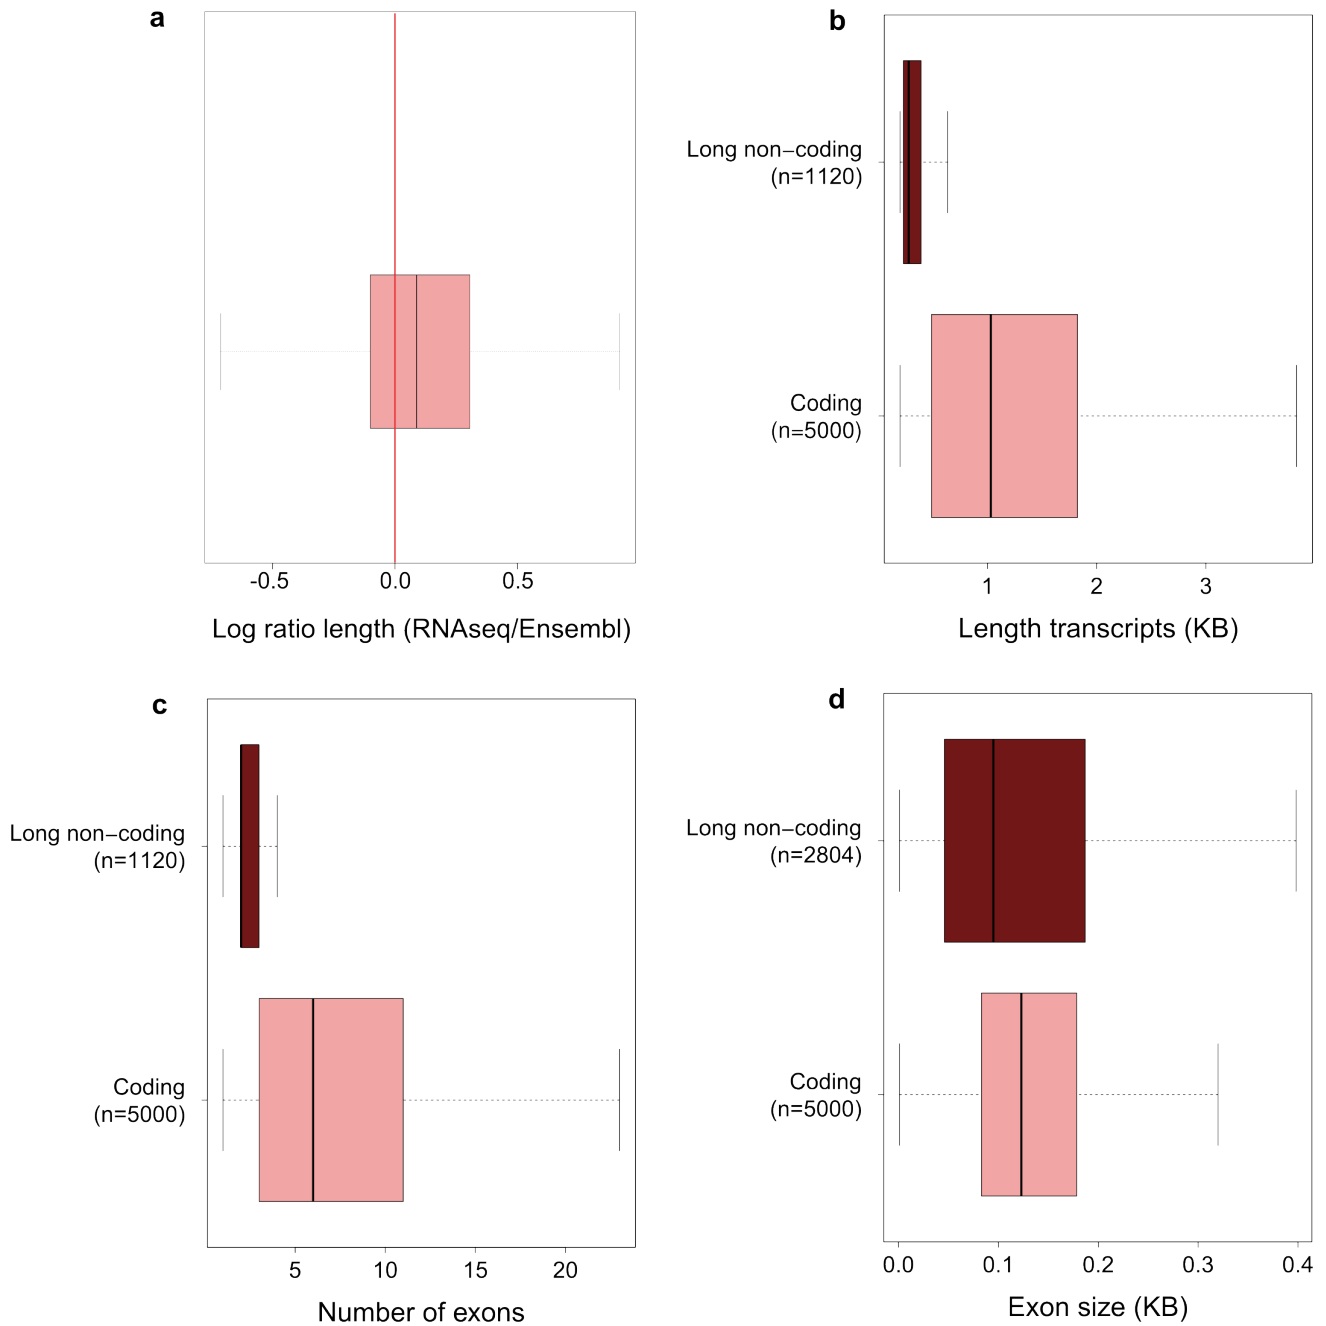

**Supplementary Figure S2. Structural features of coding and long non-coding transcripts suggest similarity of the non-coding transcripts with those detected in other vertebrates.** The average length of assembled transcripts is higher compared to the Ensembl gene models indicating a better coverage of the UTR regions by the RNAseq experiment. **a)** Length ratio of longest transcript for each mapped coding loci and its corresponding Ensembl coding gene **b)** Length of transcripts. **c)** Number of exons. **d)** Size of exons.

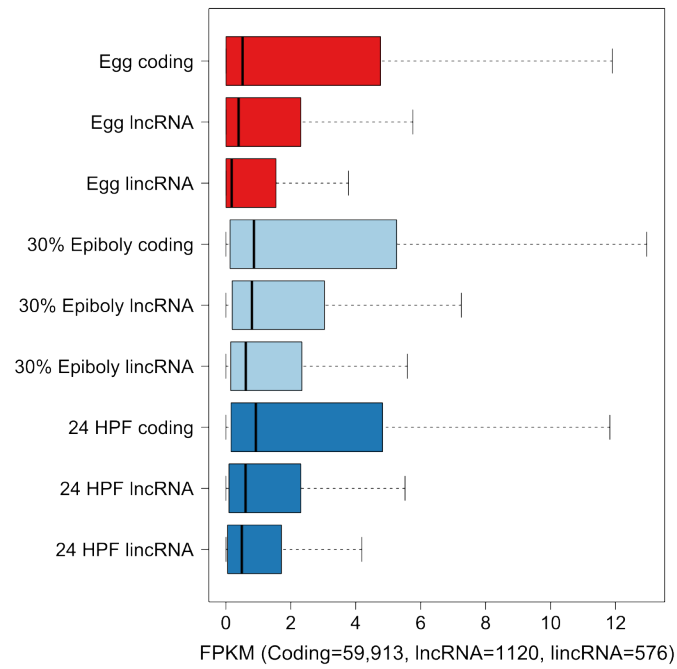

**Supplementary figure S3. Distribution of expression for coding, long non-coding and long intergenic non-coding transcripts across early developmental stages in tetraodon (FPKM).**

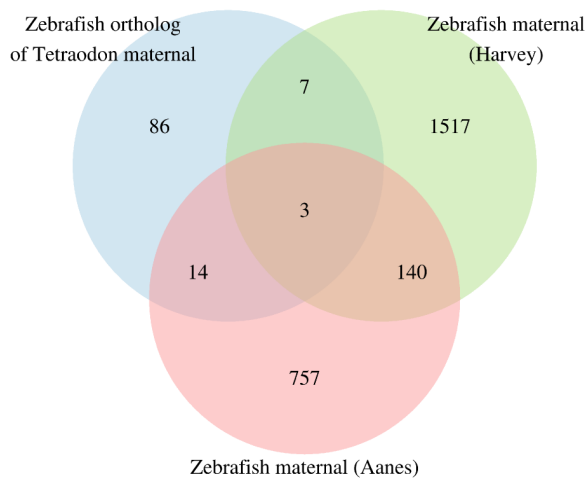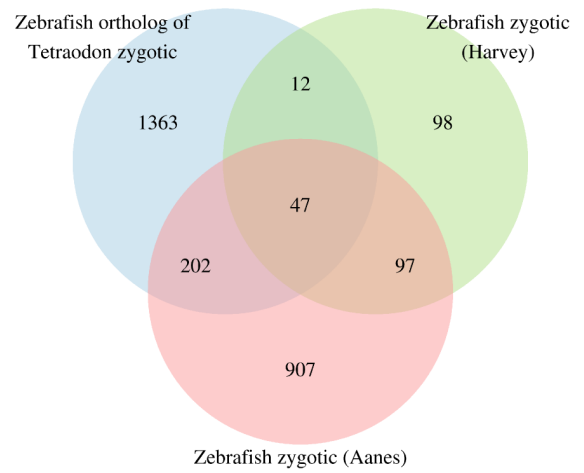

**Supplementary figure S4. Comparison of genes predicted to be maternal and embryonic specific in zebrafish and tetraodon. a) Maternal genes. b) Embryonic genes.**

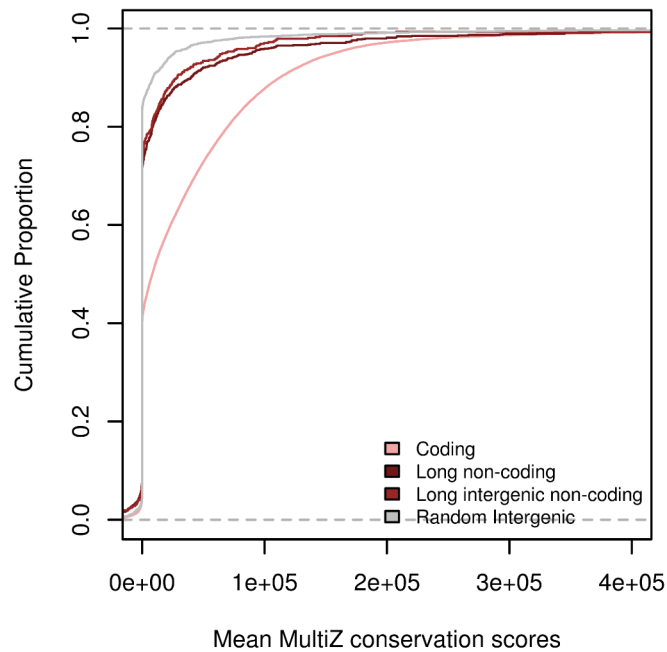

**Supplementary figure S5. Mean MultiZ 8 way whole genome alignment scores of tetraodon for coding, long non-coding and long intergenic non-coding transcripts.** The alignment scores are calculated by aligning the zebrafish genome with the human, mouse, *X. tropicalis*, tetraodon, medaka, fugu and stickleback genomes. The x-axis represents the mean MultiZ8way alignment scores and the y-axis represents the cumulative proportions of the transcripts.

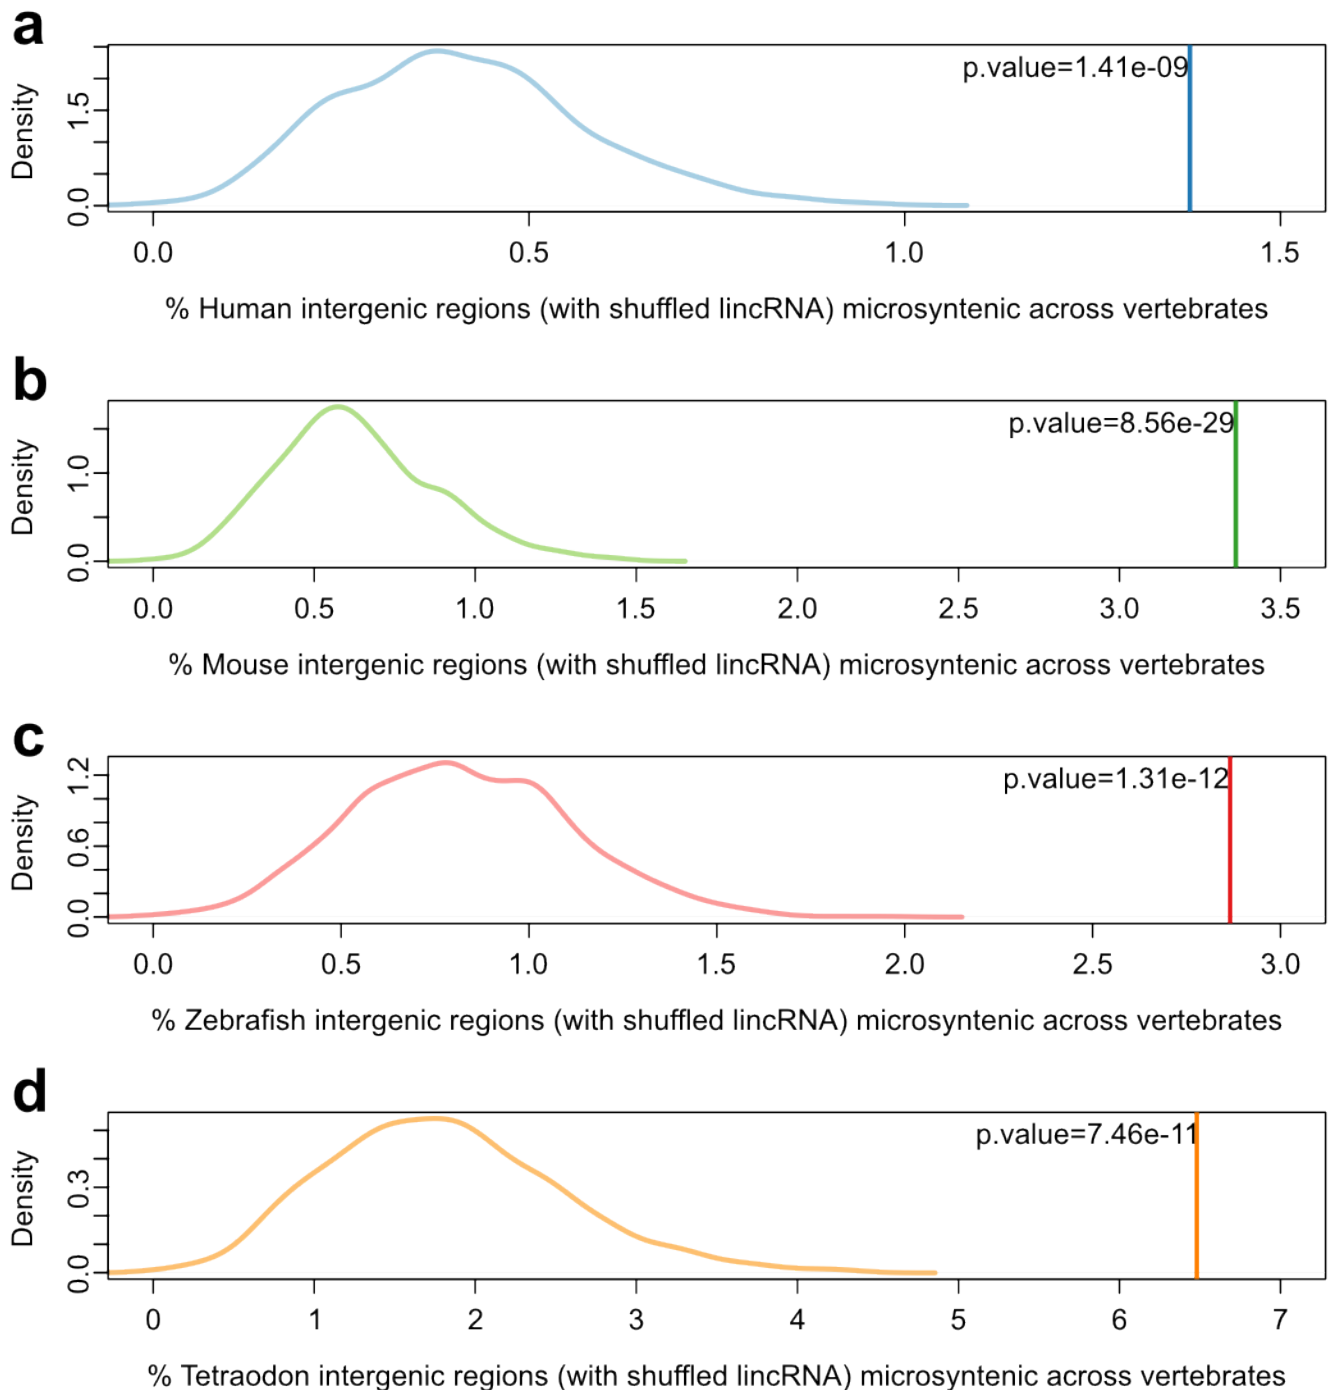

**Supplementary figure S6. Percentage of intergenic regions containing randomized lincRNAs retaining microsynteny in vertebrates based on orthology of a proximal coding gene. a) human b) mouse c) zebrafish d) tetraodon.** The vertical line in each panel shows the true percentage of intergenic regions containing a microsyntenic lincRNA.

**Supplementary table S1:** Table containing statistics for filtering and mapping of raw sequencing reads (Page 10 of this PDF).

**Supplementary table S2:** Tables containing tetraodon maternal and embryonic specific genes and their zebrafish orthologs along with expression of the tetraodon gene (from early development samples) and expression of the zebrafish gene as generated by two previous studies (Aanes *et al*, 2011; Harvey *et al*, 2013) .

**Supplementary table S3:** Tables containing GO enrichment analysis on subset of tetraodon transcripts predicted to be novel, maternal specific, embryonic specific and coding transcripts associated with embryonic specific lincRNAs (Page 11 of this PDF).

**Supplementary table S4:** Tables containing statistics and genomic coordinates of lincRNAs predicted to show sequence conservation in teleost fishes (Page 19 of this PDF).

**Supplementary table S5:** Tables about lincRNAs predicted to show microsynteny on comparison of human, mouse, zebrafish and tetraodon lincRNAs.

**Supplementary table S6:** Tables containing species specific information for vertebrate microsyntenic lincRNAs.

**Supplementary data S1:** GTF file containing the genomic coordinates on Ensembl v72 for the assembled tetraodon early development transcriptome.

**Supplementary data S2:** Tab delimited text file containing the mapping between the assembled transcriptome and the Ensembl gene models based on Ensembl.

**Supplementary data S3:** Tab delimited text file containing the results for the annotations of all the assembled transcripts as generated by Annocript.



**Supplementary data S4:** The assembled coding transcripts in BED format.

**Supplementary data S5:** The assembled lncRNAs in BED format.

**Supplementary data S6:** List of IDs of all the assembled non-coding transcripts grouped into classes based on their genomic location (Page 21 of this PDF).

**Supplementary data S7:** Tab delimited text file containing, for each transcript, the number of reads mapping from every sequenced sample.

**Supplementary data S8:** List of IDs of all the transcripts predicted to be maternal or embryonic specific during early development in tetraodon (Page 30 of this PDF).

**Supplementary data S9:** FASTA format file containing the sequences of all the assembled transcripts.

**Supplementary table S1:** Table containing statistics for filtering and mapping of raw sequencing reads.

| <b>Sample</b> | <b>Total number of reads</b> | <b>Quality filtered</b> | <b>Mapped reads</b> | <b>% Mapped</b> |
|---------------|------------------------------|-------------------------|---------------------|-----------------|
| Egg           | 229741278                    | 215219078               | 148750648           | 69.1159210337   |
| 30% Epiboly   | 248151367                    | 226292377               | 151424127           | 66.9152576006   |
| 24 hpf        | 239853692                    | 224089479               | 166611571           | 74.3504656013   |

**Supplementary table S3:** Tables containing GO enrichment analysis on subset of tetraodon transcripts predicted to be novel, maternal specific, embryonic specific and coding transcripts associated with embryonic specific lincRNAs.

## Novel transcripts

| ID         | Number of novel coding transcripts | Total novel coding transcripts | Number of coding transcripts | Total coding transcripts | pval         | definition                                                | padj         |
|------------|------------------------------------|--------------------------------|------------------------------|--------------------------|--------------|-----------------------------------------------------------|--------------|
| GO:0031047 | 9                                  | 6066                           | 30                           | 59913                    | 0.0032215264 | gene silencing by RNA                                     | 0.0354367907 |
| GO:0035188 | 5                                  | 6066                           | 8                            | 59913                    | 0.0007554944 | hatching                                                  | 0.009065933  |
| GO:0009059 | 5                                  | 6066                           | 7                            | 59913                    | 0.0003444641 | macromolecule biosynthetic process                        | 0.0050305634 |
| GO:0032793 | 9                                  | 6066                           | 23                           | 59913                    | 0.0003353709 | positive regulation of CREB transcription factor activity | 0.0050305634 |
| GO:0048785 | 5                                  | 6066                           | 7                            | 59913                    | 0.0003444641 | hatching gland development                                | 0.0050305634 |
| GO:0030001 | 7                                  | 6066                           | 12                           | 59913                    | 8.02E-005    | metal ion transport                                       | 0.001282462  |
| GO:0043087 | 6                                  | 6066                           | 8                            | 59913                    | 4.87E-005    | regulation of GTPase activity                             | 0.0008271237 |
| GO:0042989 | 5                                  | 6066                           | 5                            | 59913                    | 4.44E-005    | sequestering of actin monomers                            | 0.0007999707 |
| GO:0009607 | 10                                 | 6066                           | 15                           | 59913                    | 3.09E-007    | response to biotic stimulus                               | 5.86E-006    |
| GO:0015074 | 18                                 | 6066                           | 35                           | 59913                    | 9.54E-010    | DNA integration                                           | 1.91E-008    |
| GO:0006278 | 24                                 | 6066                           | 52                           | 59913                    | 2.70E-011    | RNA-dependent DNA replication                             | 5.68E-010    |

## Maternal specific transcripts

| ID         | Number of maternal specific coding transcripts | Total maternal specific coding transcripts | Number of coding transcripts | Total coding transcripts | pval         | definition                                                                                 | padj         |
|------------|------------------------------------------------|--------------------------------------------|------------------------------|--------------------------|--------------|--------------------------------------------------------------------------------------------|--------------|
| GO:0006351 | 10                                             | 307                                        | 731                          | 59913                    | 0.0014885902 | transcription, DNA-dependent                                                               | 0.0062940096 |
| GO:0007264 | 9                                              | 307                                        | 612                          | 59913                    | 0.0012588019 | small GTPase mediated signal transduction                                                  | 0.0062940096 |
| GO:0006184 | 5                                              | 307                                        | 183                          | 59913                    | 0.0001403324 | GTP catabolic process                                                                      | 0.0008419943 |
| GO:0007018 | 7                                              | 307                                        | 320                          | 59913                    | 8.39E-005    | microtubule-based movement                                                                 | 0.0005876317 |
| GO:0051056 | 6                                              | 307                                        | 160                          | 59913                    | 1.90E-007    | regulation of small GTPase mediated signal transduction                                    | 1.52E-006    |
| GO:0030036 | 7                                              | 307                                        | 155                          | 59913                    | 1.83E-010    | actin cytoskeleton organization                                                            | 1.64E-009    |
| GO:0042981 | 6                                              | 307                                        | 85                           | 59913                    | 5.93E-014    | regulation of apoptotic process                                                            | 5.93E-013    |
| GO:0007067 | 6                                              | 307                                        | 45                           | 59913                    | 3.27E-025    | mitosis                                                                                    | 3.60E-024    |
| GO:0060828 | 8                                              | 307                                        | 16                           | 59913                    | 1.38E-099    | regulation of canonical Wnt receptor signaling pathway                                     | 1.66E-098    |
| GO:2000053 | 8                                              | 307                                        | 8                            | 59913                    | 7.71E-150    | regulation of Wnt receptor signaling pathway involved in dorsal/ventral axis specification | 1.00E-148    |
| GO:0048263 | 12                                             | 307                                        | 25                           | 59913                    | 1.10E-150    | determination of dorsal identity                                                           | 1.55E-149    |

## Embryonic specific transcripts

| ID         | Number of embryonic specific coding transcripts | Total embryonic specific coding transcripts | Number of coding transcripts | Total coding transcripts | pval         | definition                                            | padj         |
|------------|-------------------------------------------------|---------------------------------------------|------------------------------|--------------------------|--------------|-------------------------------------------------------|--------------|
| GO:0035050 | 8                                               | 4221                                        | 30                           | 59913                    | 0.0005349675 | embryonic heart tube development                      | 0.0444023026 |
| GO:0007634 | 5                                               | 4221                                        | 12                           | 59913                    | 0.000470453  | optokinetic behavior                                  | 0.0395180483 |
| GO:0034446 | 6                                               | 4221                                        | 17                           | 59913                    | 0.0004000962 | substrate adhesion-dependent cell spreading           | 0.034008174  |
| GO:0030903 | 7                                               | 4221                                        | 22                           | 59913                    | 0.0002916939 | notochord development                                 | 0.0250856735 |
| GO:0051297 | 8                                               | 4221                                        | 28                           | 59913                    | 0.0002807559 | centrosome organization                               | 0.0244257673 |
| GO:0001707 | 5                                               | 4221                                        | 11                           | 59913                    | 0.0002547031 | mesoderm formation                                    | 0.0231779808 |
| GO:0007412 | 5                                               | 4221                                        | 11                           | 59913                    | 0.0002547031 | axon target recognition                               | 0.0231779808 |
| GO:0007413 | 5                                               | 4221                                        | 11                           | 59913                    | 0.0002547031 | axonal fasciculation                                  | 0.0231779808 |
| GO:0030177 | 5                                               | 4221                                        | 11                           | 59913                    | 0.0002547031 | positive regulation of Wnt receptor signaling pathway | 0.0231779808 |
| GO:0061001 | 6                                               | 4221                                        | 16                           | 59913                    | 0.0002463884 | regulation of dendritic spine morphogenesis           | 0.0226677366 |
| GO:0016042 | 8                                               | 4221                                        | 27                           | 59913                    | 0.0001975483 | lipid catabolic process                               | 0.0183719938 |
| GO:0048484 | 7                                               | 4221                                        | 21                           | 59913                    | 0.0001924377 | enteric nervous system development                    | 0.0180891451 |
| GO:0048870 | 8                                               | 4221                                        | 26                           | 59913                    | 0.0001360163 | cell motility                                         | 0.0129215464 |
| GO:0070098 | 9                                               | 4221                                        | 32                           | 59913                    | 0.0001284841 | chemokine-mediated signaling pathway                  | 0.0123344783 |
| GO:0048854 | 5                                               | 4221                                        | 10                           | 59913                    | 0.0001269648 | brain morphogenesis                                   | 0.0123155883 |

|            |    |      |     |       |              |                                             |              |
|------------|----|------|-----|-------|--------------|---------------------------------------------|--------------|
|            |    |      |     |       |              |                                             |              |
| GO:0016055 | 25 | 4221 | 159 | 59913 | 0.0001125797 | Wnt receptor signaling pathway              | 0.011032807  |
| GO:0001841 | 6  | 4221 | 14  | 59913 | 8.05E-005    | neural tube formation                       | 0.0079714079 |
| GO:0090305 | 16 | 4221 | 80  | 59913 | 7.78E-005    | nucleic acid phosphodiester bond hydrolysis | 0.007775205  |
| GO:0001568 | 7  | 4221 | 19  | 59913 | 7.58E-005    | blood vessel development                    | 0.0076588542 |
| GO:0048665 | 5  | 4221 | 9   | 59913 | 5.73E-005    | neuron fate specification                   | 0.0058975418 |
| GO:0051262 | 5  | 4221 | 9   | 59913 | 5.73E-005    | protein tetramerization                     | 0.0058975418 |
| GO:0009880 | 9  | 4221 | 29  | 59913 | 4.32E-005    | embryonic pattern specification             | 0.0044934642 |
| GO:0006783 | 6  | 4221 | 13  | 59913 | 4.21E-005    | heme biosynthetic process                   | 0.0044593012 |
| GO:0048546 | 6  | 4221 | 13  | 59913 | 4.21E-005    | digestive tract morphogenesis               | 0.0044593012 |
| GO:0030902 | 8  | 4221 | 23  | 59913 | 3.82E-005    | hindbrain development                       | 0.0040839271 |
| GO:0006259 | 11 | 4221 | 40  | 59913 | 2.72E-005    | DNA metabolic process                       | 0.0029675539 |
| GO:0070121 | 11 | 4221 | 40  | 59913 | 2.72E-005    | Kupffer's vesicle development               | 0.0029675539 |
| GO:0033339 | 7  | 4221 | 17  | 59913 | 2.55E-005    | pectoral fin development                    | 0.0028008456 |
| GO:0060034 | 5  | 4221 | 8   | 59913 | 2.28E-005    | notochord cell differentiation              | 0.0025341983 |
| GO:0007156 | 43 | 4221 | 313 | 59913 | 2.18E-005    | homophilic cell adhesion                    | 0.0024427582 |
| GO:0030947 | 6  | 4221 | 12  | 59913 | 2.04E-005    | regulation of vascular endothelial growth   | 0.0023083003 |

|            |    |      |    |       |           |                                             |              |
|------------|----|------|----|-------|-----------|---------------------------------------------|--------------|
|            |    |      |    |       |           | factor receptor signaling pathway           |              |
| GO:0007368 | 13 | 4221 | 52 | 59913 | 1.94E-005 | determination of left/right symmetry        | 0.002207696  |
| GO:0006979 | 11 | 4221 | 38 | 59913 | 1.38E-005 | response to oxidative stress                | 0.001582974  |
| GO:0001706 | 6  | 4221 | 11 | 59913 | 9.10E-006 | endoderm formation                          | 0.0010556859 |
| GO:0071910 | 5  | 4221 | 7  | 59913 | 7.81E-006 | determination of liver left/right asymmetry | 0.0009133639 |
| GO:0031016 | 9  | 4221 | 25 | 59913 | 7.37E-006 | pancreas development                        | 0.0008702196 |
| GO:0042074 | 14 | 4221 | 54 | 59913 | 5.03E-006 | cell migration involved in gastrulation     | 0.0005984372 |
| GO:0015074 | 11 | 4221 | 35 | 59913 | 4.40E-006 | DNA integration                             | 0.0005275802 |
| GO:0035622 | 8  | 4221 | 18 | 59913 | 2.33E-006 | intrahepatic bile duct development          | 0.0002820961 |
| GO:0046168 | 5  | 4221 | 6  | 59913 | 2.20E-006 | glycerol-3-phosphate catabolic process      | 0.0002678725 |
| GO:0001570 | 15 | 4221 | 55 | 59913 | 9.15E-007 | vasculogenesis                              | 0.0001125926 |
| GO:0003171 | 5  | 4221 | 5  | 59913 | 4.79E-007 | atrioventricular valve development          | 6.13E-005    |
| GO:0014707 | 5  | 4221 | 5  | 59913 | 4.79E-007 | branchiomic skeletal muscle development     | 6.13E-005    |
| GO:0021571 | 5  | 4221 | 5  | 59913 | 4.79E-007 | rhombomere 5 development                    | 6.13E-005    |
| GO:0021572 | 5  | 4221 | 5  | 59913 | 4.79E-007 | rhombomere 6 development                    | 6.13E-005    |
| GO:0021703 | 5  | 4221 | 5  | 59913 | 4.79E-007 | locus ceruleus development                  | 6.13E-005    |
| GO:0021535 | 6  | 4221 | 8  | 59913 | 4.00E-007 | cell migration in hindbrain                 | 5.16E-005    |

|            |    |      |     |       |           |                                                                                    |           |
|------------|----|------|-----|-------|-----------|------------------------------------------------------------------------------------|-----------|
| GO:0048709 | 8  | 4221 | 15  | 59913 | 2.39E-007 | oligodendrocyte differentiation                                                    | 3.11E-005 |
| GO:0021523 | 7  | 4221 | 11  | 59913 | 2.17E-007 | somatic motor neuron differentiation                                               | 2.84E-005 |
| GO:0007050 | 18 | 4221 | 68  | 59913 | 1.29E-007 | cell cycle arrest                                                                  | 1.70E-005 |
| GO:0060059 | 11 | 4221 | 27  | 59913 | 8.26E-008 | embryonic retina morphogenesis in camera-type eye                                  | 1.10E-005 |
| GO:0001525 | 24 | 4221 | 106 | 59913 | 6.08E-008 | angiogenesis                                                                       | 8.14E-006 |
| GO:0030335 | 8  | 4221 | 13  | 59913 | 3.62E-008 | positive regulation of cell migration                                              | 4.89E-006 |
| GO:0018149 | 10 | 4221 | 21  | 59913 | 3.25E-008 | peptide cross-linking                                                              | 4.42E-006 |
| GO:0045892 | 21 | 4221 | 82  | 59913 | 2.42E-008 | negative regulation of transcription, DNA-dependent                                | 3.32E-006 |
| GO:0016339 | 6  | 4221 | 6   | 59913 | 2.08E-008 | calcium-dependent cell-cell adhesion                                               | 2.87E-006 |
| GO:0051091 | 8  | 4221 | 12  | 59913 | 1.22E-008 | positive regulation of sequence-specific DNA binding transcription factor activity | 1.71E-006 |
| GO:2000223 | 8  | 4221 | 12  | 59913 | 1.22E-008 | regulation of BMP signaling pathway involved in heart jogging                      | 1.71E-006 |
| GO:0048332 | 7  | 4221 | 8   | 59913 | 4.70E-009 | mesoderm morphogenesis                                                             | 6.63E-007 |
| GO:0006278 | 17 | 4221 | 52  | 59913 | 3.14E-009 | RNA-dependent DNA replication                                                      | 4.46E-007 |
| GO:0009887 | 13 | 4221 | 30  | 59913 | 1.35E-009 | organ morphogenesis                                                                | 1.93E-007 |
| GO:0043049 | 10 | 4221 | 17  | 59913 | 1.02E-009 | otic placode formation                                                             | 1.46E-007 |



|            |    |      |     |       |           |                                                     |           |
|------------|----|------|-----|-------|-----------|-----------------------------------------------------|-----------|
| GO:0048339 | 8  | 4221 | 10  | 59913 | 9.63E-010 | paraxial mesoderm development                       | 1.40E-007 |
| GO:0071526 | 7  | 4221 | 7   | 59913 | 9.08E-010 | semaphorin-plexin signaling pathway                 | 1.33E-007 |
| GO:0045893 | 29 | 4221 | 117 | 59913 | 1.37E-010 | positive regulation of transcription, DNA-dependent | 2.02E-008 |
| GO:0001947 | 25 | 4221 | 85  | 59913 | 1.54E-011 | heart looping                                       | 2.28E-009 |
| GO:0036065 | 14 | 4221 | 26  | 59913 | 2.08E-012 | fucosylation                                        | 3.09E-010 |
| GO:0001756 | 34 | 4221 | 104 | 59913 | 2.40E-017 | somitogenesis                                       | 3.59E-015 |

## Coding transcripts proximal to embryonic lincRNA

| ID         | Number of coding transcripts near embryonic specific lincRNAs | Total coding transcripts near embryonic specific lincRNAs | Number of coding transcripts near lincRNAs | Total coding transcripts near lincRNAs | pval         | definition                                                       | padj         |
|------------|---------------------------------------------------------------|-----------------------------------------------------------|--------------------------------------------|----------------------------------------|--------------|------------------------------------------------------------------|--------------|
| GO:0035023 | 7                                                             | 215                                                       | 23                                         | 2566                                   | 0.0020371027 | regulation of Rho protein signal transduction                    | 0.0061113081 |
| GO:0001947 | 5                                                             | 215                                                       | 10                                         | 2566                                   | 0.0006038804 | heart looping                                                    | 0.0024155216 |
| GO:0007169 | 5                                                             | 215                                                       | 9                                          | 2566                                   | 0.0003044458 | transmembrane receptor protein tyrosine kinase signaling pathway | 0.0015222289 |
| GO:0031018 | 5                                                             | 215                                                       | 8                                          | 2566                                   | 0.0001379934 | endocrine pancreas development                                   | 0.0008279603 |
| GO:0006200 | 5                                                             | 215                                                       | 7                                          | 2566                                   | 5.48E-005    | ATP catabolic process                                            | 0.0003833798 |
| GO:0006633 | 6                                                             | 215                                                       | 8                                          | 2566                                   | 4.70E-006    | fatty acid biosynthetic process                                  | 4.23E-005    |
| GO:0007018 | 5                                                             | 215                                                       | 5                                          | 2566                                   | 4.95E-006    | microtubule-based movement                                       | 4.23E-005    |
| GO:0006486 | 9                                                             | 215                                                       | 19                                         | 2566                                   | 3.33E-006    | protein glycosylation                                            | 3.33E-005    |
| GO:0009887 | 7                                                             | 215                                                       | 7                                          | 2566                                   | 2.76E-008    | organ morphogenesis                                              | 3.31E-007    |
| GO:0048332 | 7                                                             | 215                                                       | 7                                          | 2566                                   | 2.76E-008    | mesoderm morphogenesis                                           | 3.31E-007    |
| GO:0036065 | 9                                                             | 215                                                       | 9                                          | 2566                                   | 1.57E-010    | fucosylation                                                     | 2.04E-009    |

**Supplementary table S4: Tables containing statistics and genomic coordinates of lincRNAs predicted to show sequence conservation in teleost fishes.**

**Statistics of lincRNA showing sequence conservation in comparison to shuffled genomic features in zebrafish and tetraodon**

|                                                      | Total transcripts (zebrafish) | MultiZ conserved transcripts (zebrafish) | Total transcripts (tetraodon) | MultiZ conserved transcripts (tetraodon) |
|------------------------------------------------------|-------------------------------|------------------------------------------|-------------------------------|------------------------------------------|
| lincRNAs                                             | 2699                          | 27                                       | 576                           | 10                                       |
| Shuffled elements lincRNA size and structure matched | 13140                         | 71                                       | 14970                         | 60                                       |

**List of lincRNA which show sequence conservation at the exon level between zebrafish and tetraodon**

| Name       | LincRNA loci (including proximal coding genes) |                             |       |       | Feature overlapping conserved region |           |             |             | Number of lincRNA loci between flanking coding genes |           |       |       | Synteny of flanking coding genes |         |
|------------|------------------------------------------------|-----------------------------|-------|-------|--------------------------------------|-----------|-------------|-------------|------------------------------------------------------|-----------|-------|-------|----------------------------------|---------|
|            | Tetraodon                                      | Zebrafish                   | Mouse | Human | Tetraodon                            | Zebrafish | Mouse       | Human       | Tetraodon                                            | Zebrafish | Mouse | Human | Teleost                          | Mammals |
| linc_gart  | chr3:2,595,172-2,677,286                       | chr1:1,011,559-1,068,134    | Null  | Null  | lincRNA                              | lincRNA   | Null        | Null        | 1                                                    | 1         | Null  | Null  | Yes                              | Null    |
| linc_oxr1  | chr8:1,085,318-1,151,490                       | chr16:46,337,355-46,509,235 | Null  | Null  | lincRNA                              | lincRNA   | Coding exon | Coding exon | 1                                                    | 1         | Null  | Null  | Yes                              | Yes     |
| linc_narg2 | chr13:7,566,2                                  | chr25:35,0                  | Null  | Null  | lincRNA                              | lincRNA;  | Coding      | Coding      | 1                                                    | 1         | Null  | Null  | Yes                              | Yes     |

|              | 84-7,577,232               | 06,379-35,025,324           |                              |                               |                  | coding<br>UTR in<br>v74 | UTR         | UTR     |   |   |      |      |     |      |  |
|--------------|----------------------------|-----------------------------|------------------------------|-------------------------------|------------------|-------------------------|-------------|---------|---|---|------|------|-----|------|--|
| linc_gas5    | chr1:15,659,150-15,667,229 | chr8:17,123,506-17,137,329  | chr1:162,961,363-162,972,603 | chr1:173,826,597-173,840,966  | lincRNA*; snoRNA | lincRNA*; snoRNA        | snoRNA      | snoRNA  | 1 | 1 | 1    | 1    | Yes | Null |  |
| linc_pag2g4  | chr11:7,317,977-7,323,647  | chr23:25,587,078-25,598,612 | Null                         | Null                          | lincRNA*         | lincRNA*                | Null        | Null    | 1 | 1 | Null | Null | Yes | Null |  |
| linc_vcana   | chr12:2,617,572-2,650,960  | chr5:47,909,439-48,049,230  | Null                         | Null                          | lincRNA*         | lincRNA*                | Null        | Null    | 1 | 1 | Null | Null | Yes | Null |  |
| linc_setd1ba | chr4:1,806,612-1,815,015   | chr10:43,342,780-43,356,038 | chr5:123,121,050-123,159,248 | chr12:122,227,701-122,245,066 | lincRNA*         | lincRNA*                | lincRN<br>A | lincRNA | 1 | 1 | 1    | 1    | Yes | Yes  |  |

\*CAGE support

**Supplementary data S6:** List of IDs of all the assembled non-coding transcripts grouped into classes based on their genomic location.

**Class:LincRNA**

TCONS\_00000137 TCONS\_00000209 TCONS\_00000344 TCONS\_00000345 TCONS\_00000364 TCONS\_00000716 TCONS\_00000765 TCONS\_00000906 TCONS\_00000907

TCONS\_00001075 TCONS\_00001090 TCONS\_00001166 TCONS\_00001322 TCONS\_00001331 TCONS\_00001446 TCONS\_00001520 TCONS\_00002126 TCONS\_00002139

TCONS\_00002162 TCONS\_00002175 TCONS\_00002177 TCONS\_00002311 TCONS\_00002314 TCONS\_00002407 TCONS\_00003014 TCONS\_00003407 TCONS\_00004085

TCONS\_00004105 TCONS\_00004221 TCONS\_00004633 TCONS\_00004805 TCONS\_00004832 TCONS\_00004857 TCONS\_00004858 TCONS\_00005256 TCONS\_00005357

TCONS\_00005431 TCONS\_00005700 TCONS\_00005719 TCONS\_00005751 TCONS\_00005794 TCONS\_00005998 TCONS\_00006050 TCONS\_00006209 TCONS\_00006543

TCONS\_00006599 TCONS\_00006687 TCONS\_00007003 TCONS\_00007019 TCONS\_00007127 TCONS\_00007168 TCONS\_00007274 TCONS\_00007334 TCONS\_00007540

TCONS\_00007671 TCONS\_00007923 TCONS\_00007927 TCONS\_00007928 TCONS\_00007963 TCONS\_00008376 TCONS\_00008529 TCONS\_00008535 TCONS\_00008612

TCONS\_00008661 TCONS\_00009179 TCONS\_00009199 TCONS\_00009509 TCONS\_00009582 TCONS\_00009715 TCONS\_00009716 TCONS\_00009823 TCONS\_00009947

TCONS\_00010342 TCONS\_00010382 TCONS\_00010457 TCONS\_00010461 TCONS\_00010599 TCONS\_00010736 TCONS\_00011216 TCONS\_00011437 TCONS\_00011487

TCONS\_00011535 TCONS\_00011946 TCONS\_00012001 TCONS\_00012074 TCONS\_00012176 TCONS\_00013022 TCONS\_00013175 TCONS\_00013441 TCONS\_00013491

TCONS\_00013673 TCONS\_00013674 TCONS\_00013927 TCONS\_00014303 TCONS\_00014552 TCONS\_00014553 TCONS\_00014785 TCONS\_00015031 TCONS\_00015180

TCONS\_00015399 TCONS\_00015612 TCONS\_00015632 TCONS\_00015724 TCONS\_00015727 TCONS\_00015728 TCONS\_00015751 TCONS\_00015752 TCONS\_00015787

TCONS\_00015893 TCONS\_00015935 TCONS\_00016072 TCONS\_00016262 TCONS\_00016298 TCONS\_00016774 TCONS\_00016800 TCONS\_00017021 TCONS\_00017164

TCONS\_00017475 TCONS\_00017562 TCONS\_00017620 TCONS\_00018220 TCONS\_00018227 TCONS\_00018228 TCONS\_00018229 TCONS\_00018237 TCONS\_00018256

TCONS\_00018283 TCONS\_00018668 TCONS\_00018749 TCONS\_00018793 TCONS\_00018895 TCONS\_00019194 TCONS\_00019470 TCONS\_00019809 TCONS\_00020329

TCONS\_00020487 TCONS\_00020559 TCONS\_00020644 TCONS\_00020868 TCONS\_00021537 TCONS\_00021991 TCONS\_00022030 TCONS\_00022100 TCONS\_00022115

TCONS\_00022232 TCONS\_00022549 TCONS\_00022587 TCONS\_00022898 TCONS\_00023001 TCONS\_00023297 TCONS\_00023303 TCONS\_00023571 TCONS\_00023698

TCONS\_00023959 TCONS\_00023967 TCONS\_00024417 TCONS\_00024460 TCONS\_00024523 TCONS\_00024698 TCONS\_00024842 TCONS\_00025538 TCONS\_00025563

TCONS\_00026056 TCONS\_00026057 TCONS\_00026151 TCONS\_00026662 TCONS\_00026735 TCONS\_00026736 TCONS\_00026798 TCONS\_00026822 TCONS\_00026866

TCONS\_00026963 TCONS\_00027057 TCONS\_00027116 TCONS\_00027281 TCONS\_00027312 TCONS\_00027531 TCONS\_00027608 TCONS\_00027717 TCONS\_00027738

TCONS\_00027865 TCONS\_00028094 TCONS\_00028129 TCONS\_00028134 TCONS\_00028154 TCONS\_00028472 TCONS\_00028490 TCONS\_00028685 TCONS\_00028924

TCONS\_00028925 TCONS\_00028987 TCONS\_00029215 TCONS\_00029288 TCONS\_00029391 TCONS\_00029578 TCONS\_00029630 TCONS\_00029830 TCONS\_00030084

TCONS\_00030419 TCONS\_00030420 TCONS\_00030521 TCONS\_00030567 TCONS\_00030617 TCONS\_00030670 TCONS\_00030778 TCONS\_00031274 TCONS\_00031300

TCONS\_00031329 TCONS\_00031524 TCONS\_00031532 TCONS\_00031627 TCONS\_00031712 TCONS\_00031837 TCONS\_00031990 TCONS\_00032344 TCONS\_00032407

TCONS\_00032473 TCONS\_00032526 TCONS\_00032930 TCONS\_00032960 TCONS\_00033304 TCONS\_00033365 TCONS\_00033412 TCONS\_00033627 TCONS\_00033637

TCONS\_00033863 TCONS\_00033930 TCONS\_00034066 TCONS\_00034601 TCONS\_00034642 TCONS\_00034674 TCONS\_00034702 TCONS\_00035035 TCONS\_00035241

TCONS\_00035616 TCONS\_00035673 TCONS\_00035729 TCONS\_00036235 TCONS\_00036387 TCONS\_00036471 TCONS\_00036539 TCONS\_00036614 TCONS\_00036623

TCONS\_00036922 TCONS\_00037026 TCONS\_00037268 TCONS\_00037315 TCONS\_00037613 TCONS\_00037614 TCONS\_00037706 TCONS\_00038063 TCONS\_00038292

TCONS\_00038293 TCONS\_00038294 TCONS\_00038461 TCONS\_00038508 TCONS\_00038509 TCONS\_00038663 TCONS\_00038664 TCONS\_00038758 TCONS\_00038760

TCONS\_00038974 TCONS\_00038996 TCONS\_00038997 TCONS\_00039015 TCONS\_00039175 TCONS\_00039351 TCONS\_00039374 TCONS\_00039375 TCONS\_00039501

TCONS\_00039603 TCONS\_00040235 TCONS\_00040482 TCONS\_00040483 TCONS\_00040726 TCONS\_00040825 TCONS\_00040831 TCONS\_00040902 TCONS\_00040989

TCONS\_00041282 TCONS\_00041340 TCONS\_00041341 TCONS\_00041641 TCONS\_00042124 TCONS\_00042606 TCONS\_00042741 TCONS\_00042864 TCONS\_00043175

TCONS\_00043975 TCONS\_00044050 TCONS\_00044408 TCONS\_00044557 TCONS\_00044586 TCONS\_00044630 TCONS\_00044850 TCONS\_00044997 TCONS\_00045360

TCONS\_00045421 TCONS\_00047227 TCONS\_00047556 TCONS\_00047750 TCONS\_00047763 TCONS\_00047976 TCONS\_00047977 TCONS\_00047981 TCONS\_00048125

TCONS\_00048401 TCONS\_00048792 TCONS\_00049025 TCONS\_00049379 TCONS\_00049539 TCONS\_00049852 TCONS\_00050364 TCONS\_00050372 TCONS\_00050522

TCONS\_00050523 TCONS\_00050710 TCONS\_00050846 TCONS\_00050926 TCONS\_00051436 TCONS\_00051656 TCONS\_00051716 TCONS\_00051717 TCONS\_00051800

TCONS\_00051927 TCONS\_00051960 TCONS\_00051961 TCONS\_00052075 TCONS\_00052101 TCONS\_00052194 TCONS\_00052231 TCONS\_00052440 TCONS\_00052481

TCONS\_00052629 TCONS\_00052839 TCONS\_00052892 TCONS\_00052894 TCONS\_00052900 TCONS\_00052998 TCONS\_00053182 TCONS\_00053273 TCONS\_00053893

TCONS\_00053965 TCONS\_00054027 TCONS\_00054062 TCONS\_00054131 TCONS\_00054132 TCONS\_00054174 TCONS\_00054323 TCONS\_00054334 TCONS\_00054525

TCONS\_00054567 TCONS\_00054725 TCONS\_00054799 TCONS\_00054842 TCONS\_00054899 TCONS\_00054916 TCONS\_00055157 TCONS\_00055158 TCONS\_00055236

TCONS\_00055248 TCONS\_00055271 TCONS\_00055299 TCONS\_00055331 TCONS\_00055332 TCONS\_00055951 TCONS\_00056012 TCONS\_00056404 TCONS\_00056449

TCONS\_00056504 TCONS\_00056505 TCONS\_00056619 TCONS\_00057004 TCONS\_00057018 TCONS\_00057085 TCONS\_00057214 TCONS\_00057360 TCONS\_00057428

TCONS\_00057582 TCONS\_00057637 TCONS\_00057950 TCONS\_00058250 TCONS\_00058349 TCONS\_00058359 TCONS\_00058369 TCONS\_00058527 TCONS\_00058721

TCONS\_00058945 TCONS\_00058959 TCONS\_00058983 TCONS\_00059301 TCONS\_00059303 TCONS\_00059324 TCONS\_00059469 TCONS\_00059470 TCONS\_00059476

TCONS\_00059480 TCONS\_00059495 TCONS\_00059561 TCONS\_00059562 TCONS\_00059564 TCONS\_00059584 TCONS\_00059660 TCONS\_00059832 TCONS\_00059955

TCONS\_00059956 TCONS\_00059957 TCONS\_00060097 TCONS\_00060186 TCONS\_00060509 TCONS\_00060510 TCONS\_00060603 TCONS\_00060652 TCONS\_00060804

TCONS\_00060820 TCONS\_00061062 TCONS\_00061072 TCONS\_00061191 TCONS\_00061616 TCONS\_00061757 TCONS\_00062146 TCONS\_00062472 TCONS\_00062563

TCONS\_00062614 TCONS\_00062615 TCONS\_00062676 TCONS\_00062736 TCONS\_00062769 TCONS\_00063054 TCONS\_00063155 TCONS\_00063383 TCONS\_00063384

TCONS\_00063459 TCONS\_00063514 TCONS\_00063564 TCONS\_00063591 TCONS\_00063834 TCONS\_00063838 TCONS\_00063965 TCONS\_00063992 TCONS\_00064276

TCONS\_00064357 TCONS\_00064382 TCONS\_00064489 TCONS\_00064684 TCONS\_00064685 TCONS\_00064902 TCONS\_00064928 TCONS\_00065047 TCONS\_00065292

TCONS\_00065455 TCONS\_00065508 TCONS\_00065510 TCONS\_00065511 TCONS\_00065560 TCONS\_00065750 TCONS\_00065757 TCONS\_00065838 TCONS\_00065913

TCONS\_00066038 TCONS\_00066065 TCONS\_00066094 TCONS\_00066303 TCONS\_00066327 TCONS\_00066480 TCONS\_00066481 TCONS\_00066762 TCONS\_00066954

TCONS\_00067064 TCONS\_00067526 TCONS\_00067652 TCONS\_00067971 TCONS\_00067988 TCONS\_00068148 TCONS\_00068311 TCONS\_00068651 TCONS\_00068741

TCONS\_00068902 TCONS\_00068949 TCONS\_00069456 TCONS\_00069457 TCONS\_00069619 TCONS\_00070159 TCONS\_00070578 TCONS\_00070815 TCONS\_00071365

TCONS\_00071590 TCONS\_00072077 TCONS\_00072654 TCONS\_00072714 TCONS\_00072726 TCONS\_00073242 TCONS\_00073327 TCONS\_00073571 TCONS\_00074820

TCONS\_00075325 TCONS\_00075759 TCONS\_00075849 TCONS\_00075946 TCONS\_00076478 TCONS\_00076502 TCONS\_00076553 TCONS\_00076697 TCONS\_00077091

TCONS\_00077167 TCONS\_00077291 TCONS\_00077506 TCONS\_00078599 TCONS\_00078949 TCONS\_00079208 TCONS\_00079214 TCONS\_00079632 TCONS\_00079754

TCONS\_00080366 TCONS\_00080429 TCONS\_00080656 TCONS\_00080734 TCONS\_00080844 TCONS\_00080845 TCONS\_00081180 TCONS\_00081287 TCONS\_00081288

TCONS\_00081935 TCONS\_00082735 TCONS\_00082829 TCONS\_00083003 TCONS\_00083010 TCONS\_00083161 TCONS\_00083422 TCONS\_00083679 TCONS\_00083908

TCONS\_00084074 TCONS\_00084119 TCONS\_00084186 TCONS\_00084215 TCONS\_00084221 TCONS\_00084222 TCONS\_00084297 TCONS\_00084604 TCONS\_00084973

TCONS\_00084992 TCONS\_00085337 TCONS\_00085443 TCONS\_00085567 TCONS\_00085569 TCONS\_00085588 TCONS\_00085603 TCONS\_00085708 TCONS\_00085782

TCONS\_00085839 TCONS\_00085940 TCONS\_00085945 TCONS\_00085978 TCONS\_00086022 TCONS\_00086047 TCONS\_00086233 TCONS\_00086771 TCONS\_00087074



TCONS\_00087786 TCONS\_00088706 TCONS\_00089078 TCONS\_00089792 TCONS\_00090113 TCONS\_00090680 TCONS\_00090858 TCONS\_00091129 TCONS\_00091220

TCONS\_00091373 TCONS\_00091534 TCONS\_00092469 TCONS\_00092493 TCONS\_00092499 TCONS\_00092665 TCONS\_00092721 TCONS\_00092870 TCONS\_00092878

## **Class:Intronic**

TCONS\_00000098 TCONS\_00000190 TCONS\_00000813 TCONS\_00001214 TCONS\_00001309 TCONS\_00004111 TCONS\_00004118 TCONS\_00004119 TCONS\_00004950

TCONS\_00005380 TCONS\_00005873 TCONS\_00006015 TCONS\_00007894 TCONS\_00010706 TCONS\_00010795 TCONS\_00011383 TCONS\_00013222 TCONS\_00015625

TCONS\_00016724 TCONS\_00017187 TCONS\_00017709 TCONS\_00017727 TCONS\_00017798 TCONS\_00018346 TCONS\_00018828 TCONS\_00019552 TCONS\_00019958

TCONS\_00020036 TCONS\_00020109 TCONS\_00020112 TCONS\_00020994 TCONS\_00022419 TCONS\_00022842 TCONS\_00023280 TCONS\_00025374 TCONS\_00026956

TCONS\_00027726 TCONS\_00027888 TCONS\_00028657 TCONS\_00029130 TCONS\_00032444 TCONS\_00033494 TCONS\_00033759 TCONS\_00034278 TCONS\_00035247

TCONS\_00038623 TCONS\_00038772 TCONS\_00039879 TCONS\_00040223 TCONS\_00040295 TCONS\_00040664 TCONS\_00041026 TCONS\_00041027 TCONS\_00041183

TCONS\_00041220 TCONS\_00043916 TCONS\_00044164 TCONS\_00044668 TCONS\_00045611 TCONS\_00045615 TCONS\_00045617 TCONS\_00047425 TCONS\_00047886

TCONS\_00048133 TCONS\_00048169 TCONS\_00048309 TCONS\_00049060 TCONS\_00049064 TCONS\_00049631 TCONS\_00050074 TCONS\_00050274 TCONS\_00050569

TCONS\_00050589 TCONS\_00050590 TCONS\_00051314 TCONS\_00051641 TCONS\_00051958 TCONS\_00052809 TCONS\_00052978 TCONS\_00054004 TCONS\_00054286

TCONS\_00056700 TCONS\_00057980 TCONS\_00057981 TCONS\_00058137 TCONS\_00058575 TCONS\_00058709 TCONS\_00058818 TCONS\_00059419 TCONS\_00062332

TCONS\_00062565 TCONS\_00063378 TCONS\_00063743 TCONS\_00063747 TCONS\_00064145 TCONS\_00065300 TCONS\_00067260 TCONS\_00067270 TCONS\_00067385

## **Class:Antisense**

TCONS\_00002755 TCONS\_00002797 TCONS\_00004120 TCONS\_00006350 TCONS\_00008008 TCONS\_00009662 TCONS\_00009877 TCONS\_00011529 TCONS\_00014123

TCONS\_00016099 TCONS\_00016332 TCONS\_00016333 TCONS\_00017303 TCONS\_00020517 TCONS\_00021579 TCONS\_00022724 TCONS\_00022912 TCONS\_00024756

TCONS\_00027852 TCONS\_00029348 TCONS\_00030386 TCONS\_00032867 TCONS\_00034269 TCONS\_00037238 TCONS\_00039248 TCONS\_00040913 TCONS\_00042090

TCONS\_00043638 TCONS\_00043681 TCONS\_00049744 TCONS\_00049981 TCONS\_00051678 TCONS\_00052979 TCONS\_00053025 TCONS\_00053524 TCONS\_00053892

TCONS\_00053973 TCONS\_00053974 TCONS\_00054066 TCONS\_00055087 TCONS\_00055089 TCONS\_00055561 TCONS\_00057447 TCONS\_00058141 TCONS\_00059417

TCONS\_00059977 TCONS\_00061733 TCONS\_00062134 TCONS\_00065255

## **Class:Others**

TCONS\_00000513 TCONS\_00000759 TCONS\_00000983 TCONS\_00001111 TCONS\_00001112 TCONS\_00001164 TCONS\_00001168 TCONS\_00001260 TCONS\_00001440

TCONS\_00001568 TCONS\_00002033 TCONS\_00002079 TCONS\_00002153 TCONS\_00002498 TCONS\_00002525 TCONS\_00002670 TCONS\_00002902 TCONS\_00002905

TCONS\_00003004 TCONS\_00003221 TCONS\_00003352 TCONS\_00003476 TCONS\_00003543 TCONS\_00003581 TCONS\_00004053 TCONS\_00004093 TCONS\_00004564

TCONS\_00005057 TCONS\_00005267 TCONS\_00006162 TCONS\_00006400 TCONS\_00006476 TCONS\_00006606 TCONS\_00006612 TCONS\_00006788 TCONS\_00007087

TCONS\_00007323 TCONS\_00007820 TCONS\_00007877 TCONS\_00008130 TCONS\_00008372 TCONS\_00008639 TCONS\_00008722 TCONS\_00009056 TCONS\_00009084

TCONS\_00009107 TCONS\_00009421 TCONS\_00009506 TCONS\_00009565 TCONS\_00009973 TCONS\_00010097 TCONS\_00010199 TCONS\_00010223 TCONS\_00010227

TCONS\_00010243 TCONS\_00010751 TCONS\_00010752 TCONS\_00010874 TCONS\_00011425 TCONS\_00011571 TCONS\_00012130 TCONS\_00012189 TCONS\_00012300

TCONS\_00012422 TCONS\_00012464 TCONS\_00012503 TCONS\_00013454 TCONS\_00013617 TCONS\_00013642 TCONS\_00014026 TCONS\_00014080 TCONS\_00014081

TCONS\_00014475 TCONS\_00014938 TCONS\_00014940 TCONS\_00014958 TCONS\_00015189 TCONS\_00015297 TCONS\_00015310 TCONS\_00015613 TCONS\_00015853

TCONS\_00015924 TCONS\_00015963 TCONS\_00016046 TCONS\_00016064 TCONS\_00016139 TCONS\_00016385 TCONS\_00016386 TCONS\_00016463 TCONS\_00016910

TCONS\_00016924 TCONS\_00016928 TCONS\_00016930 TCONS\_00016985 TCONS\_00016986 TCONS\_00017395 TCONS\_00017491 TCONS\_00017739 TCONS\_00018179

TCONS\_00018324 TCONS\_00018478 TCONS\_00018513 TCONS\_00018596 TCONS\_00018879 TCONS\_00019026 TCONS\_00019564 TCONS\_00019590 TCONS\_00019792

TCONS\_00020455 TCONS\_00020627 TCONS\_00020981 TCONS\_00021140 TCONS\_00021187 TCONS\_00021413 TCONS\_00021664 TCONS\_00021718 TCONS\_00021723

TCONS\_00021933 TCONS\_00021972 TCONS\_00022057 TCONS\_00022059 TCONS\_00022089 TCONS\_00022090 TCONS\_00022091 TCONS\_00022092 TCONS\_00022093

TCONS\_00022183 TCONS\_00022247 TCONS\_00022899 TCONS\_00023066 TCONS\_00023067 TCONS\_00023285 TCONS\_00023289 TCONS\_00023513 TCONS\_00023544

TCONS\_00023584 TCONS\_00023717 TCONS\_00023789 TCONS\_00023920 TCONS\_00023974 TCONS\_00023976 TCONS\_00024158 TCONS\_00024301 TCONS\_00024472

TCONS\_00024503 TCONS\_00024575 TCONS\_00024849 TCONS\_00024880 TCONS\_00024896 TCONS\_00025018 TCONS\_00025098 TCONS\_00025194 TCONS\_00026671

TCONS\_00026702 TCONS\_00026703 TCONS\_00026811 TCONS\_00026960 TCONS\_00027099 TCONS\_00027483 TCONS\_00028127 TCONS\_00028128 TCONS\_00028162

TCONS\_00028488 TCONS\_00028535 TCONS\_00028631 TCONS\_00028713 TCONS\_00028929 TCONS\_00029056 TCONS\_00029085 TCONS\_00029191 TCONS\_00029388

TCONS\_00029575 TCONS\_00029576 TCONS\_00029708 TCONS\_00029833 TCONS\_00030085 TCONS\_00030148 TCONS\_00030273 TCONS\_00030388 TCONS\_00030592

TCONS\_00030630 TCONS\_00030751 TCONS\_00030753 TCONS\_00030821 TCONS\_00030862 TCONS\_00030866 TCONS\_00031132 TCONS\_00031145 TCONS\_00031398

TCONS\_00031422 TCONS\_00031795 TCONS\_00031800 TCONS\_00032077 TCONS\_00032370 TCONS\_00032707 TCONS\_00032708 TCONS\_00032709 TCONS\_00032753

TCONS\_00032764 TCONS\_00032928 TCONS\_00033575 TCONS\_00033579 TCONS\_00033913 TCONS\_00033993 TCONS\_00034598 TCONS\_00034723 TCONS\_00035104

TCONS\_00035400 TCONS\_00035447 TCONS\_00035558 TCONS\_00035660 TCONS\_00035924 TCONS\_00035983 TCONS\_00036133 TCONS\_00036134 TCONS\_00036244

TCONS\_00036246 TCONS\_00036436 TCONS\_00036673 TCONS\_00036680 TCONS\_00036934 TCONS\_00037229 TCONS\_00037312 TCONS\_00037322 TCONS\_00037987

TCONS\_00037991 TCONS\_00038269 TCONS\_00038789 TCONS\_00038916 TCONS\_00039135 TCONS\_00039159 TCONS\_00039161 TCONS\_00039203 TCONS\_00039829

TCONS\_00040353 TCONS\_00040452 TCONS\_00040504 TCONS\_00040809 TCONS\_00040861 TCONS\_00040903 TCONS\_00040978 TCONS\_00041099 TCONS\_00041142

TCONS\_00041164 TCONS\_00041273 TCONS\_00041336 TCONS\_00041505 TCONS\_00042134 TCONS\_00042145 TCONS\_00042254 TCONS\_00042621 TCONS\_00042734

TCONS\_00042993 TCONS\_00042997 TCONS\_00043101 TCONS\_00043111 TCONS\_00043648 TCONS\_00043837 TCONS\_00043923 TCONS\_00044117 TCONS\_00044121

TCONS\_00044123 TCONS\_00044140 TCONS\_00044406 TCONS\_00044407 TCONS\_00044446 TCONS\_00044493 TCONS\_00044494 TCONS\_00044652 TCONS\_00044776

TCONS\_00044805 TCONS\_00044987 TCONS\_00045009 TCONS\_00045012 TCONS\_00045102 TCONS\_00045328 TCONS\_00045490 TCONS\_00045574 TCONS\_00046997

TCONS\_00047038 TCONS\_00047087 TCONS\_00047100 TCONS\_00047148 TCONS\_00047304 TCONS\_00047636 TCONS\_00047998 TCONS\_00048104 TCONS\_00048240

TCONS\_00048307 TCONS\_00048373 TCONS\_00048929 TCONS\_00049002 TCONS\_00049061 TCONS\_00049137 TCONS\_00049649 TCONS\_00049691 TCONS\_00049723

TCONS\_00049859 TCONS\_00049962 TCONS\_00049977 TCONS\_00050008 TCONS\_00050009 TCONS\_00050309 TCONS\_00050345 TCONS\_00050647 TCONS\_00050942

TCONS\_00051000 TCONS\_00051198 TCONS\_00051308 TCONS\_00051671 TCONS\_00051744 TCONS\_00051745 TCONS\_00051856 TCONS\_00051996 TCONS\_00052116

TCONS\_00052163 TCONS\_00052278 TCONS\_00052483 TCONS\_00052831 TCONS\_00052868 TCONS\_00053101 TCONS\_00053285 TCONS\_00053358 TCONS\_00053420

TCONS\_00053519 TCONS\_00053700 TCONS\_00053926 TCONS\_00053991 TCONS\_00054216 TCONS\_00054364 TCONS\_00054747 TCONS\_00054828 TCONS\_00054832

TCONS\_00055553 TCONS\_00055615 TCONS\_00055838 TCONS\_00055948 TCONS\_00055956 TCONS\_00055957 TCONS\_00056023 TCONS\_00056034 TCONS\_00056049

TCONS\_00056569 TCONS\_00056751 TCONS\_00056753 TCONS\_00056842 TCONS\_00056850 TCONS\_00057003 TCONS\_00057072 TCONS\_00057423 TCONS\_00057728

TCONS\_00059139 TCONS\_00059508 TCONS\_00059883 TCONS\_00059917 TCONS\_00060405 TCONS\_00060433 TCONS\_00061033 TCONS\_00061128 TCONS\_00061158

TCONS\_00061258 TCONS\_00062069 TCONS\_00062135 TCONS\_00062244 TCONS\_00062272 TCONS\_00062385 TCONS\_00062595 TCONS\_00062946 TCONS\_00062983

TCONS\_00063506 TCONS\_00063515 TCONS\_00064101 TCONS\_00064376 TCONS\_00064377 TCONS\_00064534 TCONS\_00065480 TCONS\_00065507 TCONS\_00065614

TCONS\_00065949 TCONS\_00065961 TCONS\_00066168 TCONS\_00066198 TCONS\_00066434 TCONS\_00066529 TCONS\_00066658 TCONS\_00067010 TCONS\_00067207

TCONS\_00067227 TCONS\_00067425 TCONS\_00067582 TCONS\_00068139 TCONS\_00068303 TCONS\_00068319 TCONS\_00068333 TCONS\_00068506 TCONS\_00079101

**Supplementary data S8:** List of IDs of all the transcripts predicted to be maternal or embryonic specific during early development in tetraodon.

**Class:Maternal specific transcripts**

TCONS\_00026727 TCONS\_00021172 TCONS\_00021171 TCONS\_00021173 TCONS\_00073691 TCONS\_00070957 TCONS\_00073688 TCONS\_00048092 TCONS\_00054938

TCONS\_00054939 TCONS\_00048093 TCONS\_00014123 TCONS\_00051109 TCONS\_00026726 TCONS\_00071968 TCONS\_00058359 TCONS\_00055454 TCONS\_00055455

TCONS\_00010382 TCONS\_00011311 TCONS\_00020719 TCONS\_00011312 TCONS\_00010073 TCONS\_00028381 TCONS\_00040623 TCONS\_00052515 TCONS\_00075607

TCONS\_00075608 TCONS\_00084028 TCONS\_00038655 TCONS\_00038656 TCONS\_00042555 TCONS\_00042554 TCONS\_00040622 TCONS\_00014079 TCONS\_00040621

TCONS\_00021751 TCONS\_00064900 TCONS\_00063831 TCONS\_00014643 TCONS\_00015821 TCONS\_00044176 TCONS\_00013951 TCONS\_00038293 TCONS\_00013304

TCONS\_00038294 TCONS\_00058175 TCONS\_00047813 TCONS\_00038292 TCONS\_00035987 TCONS\_00052514 TCONS\_00058176 TCONS\_00072282 TCONS\_00021750

TCONS\_00014065 TCONS\_00008790 TCONS\_00054772 TCONS\_00017359 TCONS\_00017358 TCONS\_00019777 TCONS\_00019778 TCONS\_00018613 TCONS\_00018614

TCONS\_00077282 TCONS\_00047218 TCONS\_00053623 TCONS\_00047219 TCONS\_00033013 TCONS\_00006028 TCONS\_00000682 TCONS\_00010453 TCONS\_00033012

TCONS\_00035222 TCONS\_00035223 TCONS\_00004513 TCONS\_00034249 TCONS\_00058358 TCONS\_00001222 TCONS\_00006025 TCONS\_00006026 TCONS\_00001221

TCONS\_00051826 TCONS\_00054033 TCONS\_00053027 TCONS\_00074031 TCONS\_00045511 TCONS\_00045982 TCONS\_00018953 TCONS\_00082354 TCONS\_00045983

TCONS\_00046332 TCONS\_00046584 TCONS\_00080235 TCONS\_00000897 TCONS\_00044524 TCONS\_00010454 TCONS\_00032163 TCONS\_00038080 TCONS\_00002922

TCONS\_00006027 TCONS\_00018952 TCONS\_00071728 TCONS\_00002923 TCONS\_00038987 TCONS\_00023799 TCONS\_00017674 TCONS\_00028436 TCONS\_00026791

TCONS\_00073242 TCONS\_00023368 TCONS\_00023800 TCONS\_00028435 TCONS\_00032249 TCONS\_00023387 TCONS\_00029275 TCONS\_00033874 TCONS\_00009535

TCONS\_00029274 TCONS\_00058745 TCONS\_00044776 TCONS\_00047055 TCONS\_00048739 TCONS\_00032641 TCONS\_00034969 TCONS\_00033875 TCONS\_00012022

TCONS\_00058141 TCONS\_00005912 TCONS\_00030325 TCONS\_00057956 TCONS\_00038985 TCONS\_00045896 TCONS\_00012295 TCONS\_00005913 TCONS\_00010050

TCONS\_00034968 TCONS\_00039246 TCONS\_00041221 TCONS\_00056588 TCONS\_00046252 TCONS\_00020860 TCONS\_00011279 TCONS\_00012470 TCONS\_00043680

TCONS\_00063415 TCONS\_00063414 TCONS\_00064498 TCONS\_00065448 TCONS\_00064497 TCONS\_00065449 TCONS\_00089782 TCONS\_00081923 TCONS\_00056810

TCONS\_00010049 TCONS\_00067721 TCONS\_00005914 TCONS\_00005047 TCONS\_00067722 TCONS\_00005046 TCONS\_00001351 TCONS\_00055443 TCONS\_00055442

TCONS\_00073563 TCONS\_00038288 TCONS\_00040214 TCONS\_00023873 TCONS\_00058254 TCONS\_00006909 TCONS\_00058255 TCONS\_00023608 TCONS\_00025300

TCONS\_00033492 TCONS\_00034633 TCONS\_00057616 TCONS\_00023436 TCONS\_00023437 TCONS\_00066569 TCONS\_00068642 TCONS\_00060253 TCONS\_00032243

TCONS\_00070055 TCONS\_00023273 TCONS\_00023435 TCONS\_00043059 TCONS\_00087132 TCONS\_00061341 TCONS\_00039237 TCONS\_00041211 TCONS\_00034635

TCONS\_00061342 TCONS\_00042512 TCONS\_00033493 TCONS\_00060254 TCONS\_00063417 TCONS\_00063416 TCONS\_00062412 TCONS\_00025049 TCONS\_00047905

TCONS\_00040215 TCONS\_0006685 TCONS\_00062411 TCONS\_00050948 TCONS\_00060252 TCONS\_00022118 TCONS\_00066695 TCONS\_00023003 TCONS\_00022119

TCONS\_00088787 TCONS\_00072187 TCONS\_00021053 TCONS\_00034634 TCONS\_00078418 TCONS\_00013057 TCONS\_00032250 TCONS\_00087133 TCONS\_00049490

TCONS\_00031855 TCONS\_00029898 TCONS\_00031854 TCONS\_00030924 TCONS\_00048423 TCONS\_00035810 TCONS\_00049999 TCONS\_00060667 TCONS\_00047506

TCONS\_00061770 TCONS\_00043711 TCONS\_00043968 TCONS\_00043712 TCONS\_00049122 TCONS\_00069908 TCONS\_00050981 TCONS\_00050982 TCONS\_00050980

TCONS\_00047971 TCONS\_00060096 TCONS\_00049582 TCONS\_00047970 TCONS\_00090706 TCONS\_00035809 TCONS\_00047969 TCONS\_00024826 TCONS\_00000329

TCONS\_00050914 TCONS\_00083183 TCONS\_00058083 TCONS\_00066480 TCONS\_00087134 TCONS\_00003362 TCONS\_00047864 TCONS\_0006367 TCONS\_00032434

TCONS\_00054980 TCONS\_00004243 TCONS\_00069907 TCONS\_0006806 TCONS\_00010159 TCONS\_00064372 TCONS\_00011402 TCONS\_00000814 TCONS\_00059254

TCONS\_00063288 TCONS\_00058081 TCONS\_00008119 TCONS\_00020604 TCONS\_00037184 TCONS\_00069663 TCONS\_00006592 TCONS\_00044394 TCONS\_00058080

TCONS\_00063289 TCONS\_00006276 TCONS\_00066130 TCONS\_00007576 TCONS\_00055031 TCONS\_00013106 TCONS\_00007577 TCONS\_00006277 TCONS\_00073140

TCONS\_00064373 TCONS\_00055378 TCONS\_00056590 TCONS\_00074106 TCONS\_00056530 TCONS\_00038602 TCONS\_00039236 TCONS\_00072970 TCONS\_00015746

TCONS\_00013213 TCONS\_00063051 TCONS\_00082419 TCONS\_00040565 TCONS\_00013107 TCONS\_00066131 TCONS\_00047476 TCONS\_00082418 TCONS\_00022645

TCONS\_00014545 TCONS\_00073205 TCONS\_00089524 TCONS\_00065159 TCONS\_00066211 TCONS\_00078419 TCONS\_00073308 TCONS\_00059983 TCONS\_00047208

TCONS\_00055346 TCONS\_00039272 TCONS\_00047209 TCONS\_00065980 TCONS\_00056498 TCONS\_00036143 TCONS\_00013313 TCONS\_00013314 TCONS\_00038765

TCONS\_00068071 TCONS\_00069612

## **Class:Embryonic specific transcripts**

TCONS\_00035125 TCONS\_00035126 TCONS\_00034101 TCONS\_00033404 TCONS\_00034573 TCONS\_00046342 TCONS\_00010636 TCONS\_00083117 TCONS\_00010635

TCONS\_00042222 TCONS\_00040248 TCONS\_00040247 TCONS\_00084220 TCONS\_00028114 TCONS\_00010715 TCONS\_00080647 TCONS\_00021479 TCONS\_00022514

TCONS\_00040249 TCONS\_00026098 TCONS\_00026408 TCONS\_00021403 TCONS\_00028513 TCONS\_00027650 TCONS\_00085571 TCONS\_00025567 TCONS\_00024867

TCONS\_00084624 TCONS\_00012469 TCONS\_00065571 TCONS\_00064679 TCONS\_00053148 TCONS\_00028514 TCONS\_00027651 TCONS\_00043787 TCONS\_00091627

TCONS\_00053149 TCONS\_00082587 TCONS\_00028031 TCONS\_00028032 TCONS\_00028033 TCONS\_00033426 TCONS\_00091628 TCONS\_00011276 TCONS\_00086026

TCONS\_00082586 TCONS\_00005089 TCONS\_00079113 TCONS\_00061610 TCONS\_00061303 TCONS\_00084428 TCONS\_00003421 TCONS\_00028833 TCONS\_00028834

TCONS\_00044028 TCONS\_00061611 TCONS\_00054134 TCONS\_00030566 TCONS\_00030565 TCONS\_00059533 TCONS\_00053150 TCONS\_00088883 TCONS\_00080835

TCONS\_00041980 TCONS\_00040498 TCONS\_00039957 TCONS\_00041979 TCONS\_00078718 TCONS\_00039956 TCONS\_00087372 TCONS\_00089097 TCONS\_00031542



TCONS\_00079212 TCONS\_00042461 TCONS\_00081076 TCONS\_00011028 TCONS\_00012265 TCONS\_00061290 TCONS\_00064787 TCONS\_00030564 TCONS\_00027648

TCONS\_00042957 TCONS\_00052975 TCONS\_00041079 TCONS\_00061609 TCONS\_00067508 TCONS\_00067509 TCONS\_00059001 TCONS\_00028511 TCONS\_00061431

TCONS\_00062492 TCONS\_00046410 TCONS\_00040892 TCONS\_00062350 TCONS\_00079114 TCONS\_00064556 TCONS\_00087709 TCONS\_00011660 TCONS\_00046085

TCONS\_00003010 TCONS\_00058714 TCONS\_00058713 TCONS\_00062650 TCONS\_00081995 TCONS\_00062349 TCONS\_00061282 TCONS\_00050851 TCONS\_00028521

TCONS\_00080324 TCONS\_00078709 TCONS\_00030186 TCONS\_00067713 TCONS\_00077674 TCONS\_00086550 TCONS\_00068718 TCONS\_00042595 TCONS\_00004852

TCONS\_00040671 TCONS\_00027708 TCONS\_00061921 TCONS\_00049422 TCONS\_00060803 TCONS\_00067397 TCONS\_00068458 TCONS\_00081947 TCONS\_00064682

TCONS\_00003120 TCONS\_00024902 TCONS\_00065574 TCONS\_00028831 TCONS\_00064681 TCONS\_00010741 TCONS\_00028030 TCONS\_00028841 TCONS\_00028043

TCONS\_00080482 TCONS\_00027662 TCONS\_00081462 TCONS\_00049423 TCONS\_00080453 TCONS\_00042411 TCONS\_00061608 TCONS\_00088639 TCONS\_00027435

TCONS\_00040450 TCONS\_00078283 TCONS\_00053308 TCONS\_00054274 TCONS\_00089834 TCONS\_00040893 TCONS\_00081077 TCONS\_00090461 TCONS\_00090462

TCONS\_00081946 TCONS\_00026093 TCONS\_00026404 TCONS\_00026403 TCONS\_00026092 TCONS\_00082781 TCONS\_00046837 TCONS\_00046945 TCONS\_00067140

TCONS\_00048986 TCONS\_00003309 TCONS\_00091949 TCONS\_00003310 TCONS\_00084906 TCONS\_00078798 TCONS\_00089589 TCONS\_00026094 TCONS\_00091623

TCONS\_00081879 TCONS\_00081880 TCONS\_00046836 TCONS\_00010989 TCONS\_00037254 TCONS\_00080452 TCONS\_00065749 TCONS\_00068356 TCONS\_00002315

TCONS\_00089835 TCONS\_00046795 TCONS\_00084425 TCONS\_00064114 TCONS\_00064905 TCONS\_00067296 TCONS\_00085584 TCONS\_00046907 TCONS\_00036607

TCONS\_00087017 TCONS\_00067297 TCONS\_00067063 TCONS\_00068151 TCONS\_00063966 TCONS\_00022156 TCONS\_00078939 TCONS\_00030627 TCONS\_00012525

TCONS\_00026459 TCONS\_00026161 TCONS\_00011347 TCONS\_00068216 TCONS\_00046344 TCONS\_00027661 TCONS\_00011337 TCONS\_00031577 TCONS\_00011338

TCONS\_00055863 TCONS\_00057023 TCONS\_00055864 TCONS\_00078940 TCONS\_00077714 TCONS\_00057024 TCONS\_00086017 TCONS\_00083907 TCONS\_00084562

TCONS\_00088749 TCONS\_00046343 TCONS\_00040705 TCONS\_00082346 TCONS\_00090115 TCONS\_00028930 TCONS\_00025602 TCONS\_00068150 TCONS\_00062484

TCONS\_00062485 TCONS\_00082347 TCONS\_00028170 TCONS\_00064680 TCONS\_00087265 TCONS\_00058825 TCONS\_00085706 TCONS\_00091239 TCONS\_00046782

TCONS\_00086581 TCONS\_00027913 TCONS\_00027912 TCONS\_00083150 TCONS\_00084192 TCONS\_00089397 TCONS\_00002195 TCONS\_00043088 TCONS\_00041241

TCONS\_00004993 TCONS\_00031678 TCONS\_00040229 TCONS\_00081464 TCONS\_00084199 TCONS\_00042206 TCONS\_00081276 TCONS\_00083487 TCONS\_00082145

TCONS\_00089961 TCONS\_00042207 TCONS\_00087264 TCONS\_00041140 TCONS\_00012101 TCONS\_00049420 TCONS\_00012102 TCONS\_00018177 TCONS\_00091455

TCONS\_00003306 TCONS\_00042416 TCONS\_00040459 TCONS\_00080829 TCONS\_00085832 TCONS\_00080827 TCONS\_00080627 TCONS\_00010687 TCONS\_00055862

TCONS\_00088874 TCONS\_00061289 TCONS\_00011959 TCONS\_00021856 TCONS\_00022774 TCONS\_00078235 TCONS\_00080828 TCONS\_00078356 TCONS\_00003307

TCONS\_00084189 TCONS\_00082230 TCONS\_00062085 TCONS\_00090042 TCONS\_00068357 TCONS\_00036306 TCONS\_00026293 TCONS\_00064868 TCONS\_00019456

TCONS\_00081153 TCONS\_00018175 TCONS\_00068108 TCONS\_00027911 TCONS\_00018176 TCONS\_00003311 TCONS\_00082212 TCONS\_00067036 TCONS\_00003631

TCONS\_00003632 TCONS\_00005289 TCONS\_00058596 TCONS\_00036997 TCONS\_00019909 TCONS\_00059182 TCONS\_00056401 TCONS\_00019811 TCONS\_00059181

TCONS\_00025462 TCONS\_00089149 TCONS\_00056400 TCONS\_00024728 TCONS\_00033195 TCONS\_00084450 TCONS\_00019532 TCONS\_00019533 TCONS\_00045332

TCONS\_00028727 TCONS\_00028726 TCONS\_00021993 TCONS\_00083762 TCONS\_00033391 TCONS\_00010842 TCONS\_00021992 TCONS\_00010841 TCONS\_00010854

TCONS\_00018774 TCONS\_00034565 TCONS\_00065559 TCONS\_00049387 TCONS\_00084200 TCONS\_00030733 TCONS\_00043855 TCONS\_00067586 TCONS\_00067585

TCONS\_00030610 TCONS\_00056443 TCONS\_00082166 TCONS\_00018775 TCONS\_00044080 TCONS\_00064154 TCONS\_00004992 TCONS\_00042126 TCONS\_00040122

TCONS\_00026253 TCONS\_00027835 TCONS\_00077715 TCONS\_00085039 TCONS\_00049843 TCONS\_00049844 TCONS\_00068628 TCONS\_00068629 TCONS\_00087369

TCONS\_00064155 TCONS\_00086012 TCONS\_00022901 TCONS\_00022900 TCONS\_00065180 TCONS\_00025566 TCONS\_00090602 TCONS\_00058811 TCONS\_00083007

TCONS\_00018773 TCONS\_00027982 TCONS\_00036266 TCONS\_00081973 TCONS\_00051235 TCONS\_00081972 TCONS\_00027981 TCONS\_00061417 TCONS\_00050829

TCONS\_00040120 TCONS\_00040365 TCONS\_00067360 TCONS\_00058809 TCONS\_00080483 TCONS\_00042325 TCONS\_00026448 TCONS\_00026145 TCONS\_00026449

TCONS\_00003140 TCONS\_00090030 TCONS\_00083139 TCONS\_00040123 TCONS\_00058810 TCONS\_00040579 TCONS\_00052944 TCONS\_00033885 TCONS\_00024866

TCONS\_00020091 TCONS\_00049126 TCONS\_00025024 TCONS\_00085594 TCONS\_00033886 TCONS\_00085787 TCONS\_00007140 TCONS\_00024147 TCONS\_00025025

TCONS\_00060974 TCONS\_00085040 TCONS\_00045331 TCONS\_00091461 TCONS\_00033950 TCONS\_00061919 TCONS\_00042521 TCONS\_00053202 TCONS\_00035016

TCONS\_00090459 TCONS\_00033402 TCONS\_00050640 TCONS\_00033949 TCONS\_00059545 TCONS\_00040121 TCONS\_00034571 TCONS\_00060802 TCONS\_00036305

TCONS\_00068769 TCONS\_00067774 TCONS\_00061489 TCONS\_00031099 TCONS\_00034572 TCONS\_00062547 TCONS\_00062546 TCONS\_00040727 TCONS\_00064785

TCONS\_00085049 TCONS\_00040728 TCONS\_00081594 TCONS\_00031100 TCONS\_00059374 TCONS\_00059373 TCONS\_00058808 TCONS\_00084212 TCONS\_00059016

TCONS\_00031098 TCONS\_00035017 TCONS\_00049109 TCONS\_00049108 TCONS\_00058806 TCONS\_00004383 TCONS\_00033415 TCONS\_00082667 TCONS\_00033416

TCONS\_00046532 TCONS\_00046531 TCONS\_00030039 TCONS\_00009115 TCONS\_00084449 TCONS\_00007982 TCONS\_00045071 TCONS\_00045529 TCONS\_00033414

TCONS\_00049388 TCONS\_00030040 TCONS\_00078535 TCONS\_00082779 TCONS\_00077897 TCONS\_00079284 TCONS\_00033951 TCONS\_00061416 TCONS\_00050520

TCONS\_00082886 TCONS\_00088371 TCONS\_00071561 TCONS\_00061418 TCONS\_00088372 TCONS\_00027910 TCONS\_00081395 TCONS\_00071560 TCONS\_00031531

TCONS\_00085231 TCONS\_00056506 TCONS\_00079234 TCONS\_00068767 TCONS\_00091522 TCONS\_00058807 TCONS\_00030557 TCONS\_00030556 TCONS\_00031530

TCONS\_00084282 TCONS\_00061419 TCONS\_00002316 TCONS\_00004238 TCONS\_00040134 TCONS\_00037697 TCONS\_00030740 TCONS\_00037696 TCONS\_00010790

TCONS\_00087237 TCONS\_00078536 TCONS\_00083761 TCONS\_00067772 TCONS\_00084281 TCONS\_00060801 TCONS\_00090604 TCONS\_00007784 TCONS\_00053020

TCONS\_00091521 TCONS\_00053887 TCONS\_00064668 TCONS\_00064669 TCONS\_00046530 TCONS\_00033561 TCONS\_00014418 TCONS\_00046267 TCONS\_00030555

TCONS\_00079608 TCONS\_00083145 TCONS\_00033959 TCONS\_00068759 TCONS\_00004076 TCONS\_00033971 TCONS\_00081299 TCONS\_00040133 TCONS\_00053457

TCONS\_0002081 TCONS\_00033970 TCONS\_00081342 TCONS\_00067437 TCONS\_00002082 TCONS\_00084213 TCONS\_00025346 TCONS\_00079101 TCONS\_00067758

TCONS\_00042138 TCONS\_00004329 TCONS\_00064363 TCONS\_00064521 TCONS\_00083506 TCONS\_00030755 TCONS\_00030739 TCONS\_00061607 TCONS\_00057196

TCONS\_00033754 TCONS\_00090603 TCONS\_00052832 TCONS\_00024552 TCONS\_00033755 TCONS\_00065460 TCONS\_00041369 TCONS\_00033756 TCONS\_00062648

TCONS\_00019920 TCONS\_00026451 TCONS\_00041368 TCONS\_00062649 TCONS\_00033403 TCONS\_00082826 TCONS\_00082827 TCONS\_00057195 TCONS\_00082211

TCONS\_00060980 TCONS\_00090599 TCONS\_00040871 TCONS\_00052941 TCONS\_00002430 TCONS\_00007051 TCONS\_00026146 TCONS\_00015793 TCONS\_00082780

TCONS\_00061606 TCONS\_00024480 TCONS\_00018794 TCONS\_00008344 TCONS\_00081343 TCONS\_00082563 TCONS\_00026147 TCONS\_00050620 TCONS\_00090292

TCONS\_00042137 TCONS\_00064522 TCONS\_00081449 TCONS\_00012234 TCONS\_00042875 TCONS\_00055991 TCONS\_00053676 TCONS\_00082733 TCONS\_00055990

TCONS\_00033958 TCONS\_00008345 TCONS\_00018459 TCONS\_00090876 TCONS\_00040985 TCONS\_00044808 TCONS\_00034872 TCONS\_00024553 TCONS\_00049538

TCONS\_00081539 TCONS\_00090875 TCONS\_00005303 TCONS\_00019661 TCONS\_00053675 TCONS\_00034873 TCONS\_00092061 TCONS\_00014862 TCONS\_00090029

TCONS\_00015993 TCONS\_00003671 TCONS\_00034875 TCONS\_00081396 TCONS\_00034874 TCONS\_00014749 TCONS\_00034936 TCONS\_00003653 TCONS\_00062499

TCONS\_00002053 TCONS\_00018440 TCONS\_00024146 TCONS\_00014750 TCONS\_00092499 TCONS\_00043979 TCONS\_00035092 TCONS\_00018532 TCONS\_00062498

TCONS\_00090460 TCONS\_00033824 TCONS\_00043978 TCONS\_00083098 TCONS\_00036411 TCONS\_00078258 TCONS\_00086997 TCONS\_00015910 TCONS\_00091895

TCONS\_00002432 TCONS\_00002433 TCONS\_00082226 TCONS\_00090037 TCONS\_00002955 TCONS\_00087821 TCONS\_00083628 TCONS\_00086591 TCONS\_00046086

TCONS\_00081303 TCONS\_00088190 TCONS\_00082225 TCONS\_00041288 TCONS\_00041287 TCONS\_00084101 TCONS\_00036629 TCONS\_00049446 TCONS\_00088562

TCONS\_00028168 TCONS\_00030734 TCONS\_00090769 TCONS\_00003176 TCONS\_00086725 TCONS\_00062195 TCONS\_00084269 TCONS\_00068627 TCONS\_00011168

TCONS\_00078157 TCONS\_00002077 TCONS\_00007684 TCONS\_00008876 TCONS\_00061097 TCONS\_00040704 TCONS\_00008877 TCONS\_00091707 TCONS\_00014396

TCONS\_00024253 TCONS\_00025118 TCONS\_00091516 TCONS\_00091131 TCONS\_00003605 TCONS\_00089815 TCONS\_00092164 TCONS\_00065253 TCONS\_00089816

TCONS\_00067656 TCONS\_00067657 TCONS\_00018658 TCONS\_00091515 TCONS\_00028929 TCONS\_00014395 TCONS\_00083160 TCONS\_00080333 TCONS\_00082316

TCONS\_00043119 TCONS\_00026163 TCONS\_00021663 TCONS\_00014606 TCONS\_00026164 TCONS\_00073131 TCONS\_00011581 TCONS\_00082319 TCONS\_00037104

TCONS\_00056505 TCONS\_00036428 TCONS\_00004075 TCONS\_00086588 TCONS\_00056504 TCONS\_00081159 TCONS\_00077721 TCONS\_00040928 TCONS\_00083129

TCONS\_00067756 TCONS\_00052834 TCONS\_00079738 TCONS\_00087216 TCONS\_00080719 TCONS\_00082320 TCONS\_00082321 TCONS\_00078512 TCONS\_00078513

TCONS\_00054578 TCONS\_00057067 TCONS\_00033812 TCONS\_00055943 TCONS\_00010791 TCONS\_00053677 TCONS\_00081824 TCONS\_00083215 TCONS\_00080718

TCONS\_00027434 TCONS\_00052943 TCONS\_00082318 TCONS\_00005021 TCONS\_00061281 TCONS\_00081825 TCONS\_00083262 TCONS\_00090730 TCONS\_00088799

TCONS\_00007034 TCONS\_00037633 TCONS\_00024481 TCONS\_00084285 TCONS\_00027926 TCONS\_00052942 TCONS\_00083263 TCONS\_00041240 TCONS\_00080845

TCONS\_00077720 TCONS\_00053983 TCONS\_00015909 TCONS\_00091523 TCONS\_00002499 TCONS\_00004375 TCONS\_00046573 TCONS\_00090558 TCONS\_00046314

TCONS\_00079249 TCONS\_00061675 TCONS\_00035090 TCONS\_00082939 TCONS\_00060973 TCONS\_00037724 TCONS\_00016216 TCONS\_00003328 TCONS\_00015100

TCONS\_00081606 TCONS\_00009062 TCONS\_00008582 TCONS\_00046268 TCONS\_00002076 TCONS\_00033983 TCONS\_00026216 TCONS\_00088760 TCONS\_00025292

TCONS\_00049444 TCONS\_00064798 TCONS\_00031278 TCONS\_00084424 TCONS\_00017992 TCONS\_00078548 TCONS\_00077694 TCONS\_00088848 TCONS\_00089286

TCONS\_00030245 TCONS\_00035034 TCONS\_00007317 TCONS\_00083717 TCONS\_00028403 TCONS\_00027547 TCONS\_00028402 TCONS\_00015099 TCONS\_00007886

TCONS\_00078205 TCONS\_00060971 TCONS\_00026462 TCONS\_00024145 TCONS\_00090686 TCONS\_00088563 TCONS\_00036728 TCONS\_00079912 TCONS\_00049443

TCONS\_00049447 TCONS\_00080844 TCONS\_00078206 TCONS\_00052831 TCONS\_00065671 TCONS\_00049213 TCONS\_00083582 TCONS\_00030046 TCONS\_00081319

TCONS\_00007671 TCONS\_00004967 TCONS\_00004968 TCONS\_00037103 TCONS\_00088675 TCONS\_00002434 TCONS\_00044685 TCONS\_00036427 TCONS\_00083583

TCONS\_00026168 TCONS\_00053984 TCONS\_00002570 TCONS\_00041294 TCONS\_00088284 TCONS\_00091173 TCONS\_00081448 TCONS\_00089387 TCONS\_00036726

TCONS\_00064031 TCONS\_00030048 TCONS\_00007414 TCONS\_00043879 TCONS\_00091172 TCONS\_00091199 TCONS\_00035091 TCONS\_00007833 TCONS\_00077348

TCONS\_00024864 TCONS\_00040462 TCONS\_00054577 TCONS\_00084645 TCONS\_00081287 TCONS\_00003269 TCONS\_00042417 TCONS\_00022908 TCONS\_00080430

TCONS\_00040461 TCONS\_00042418 TCONS\_00049985 TCONS\_00079913 TCONS\_00067092 TCONS\_00090681 TCONS\_00083213 TCONS\_00019277 TCONS\_00080288

TCONS\_00064032 TCONS\_00079911 TCONS\_00007787 TCONS\_00007415 TCONS\_00008676 TCONS\_00008675 TCONS\_00089591 TCONS\_00027654 TCONS\_00079600

TCONS\_00065710 TCONS\_00061756 TCONS\_00066743 TCONS\_00015202 TCONS\_00016290 TCONS\_00064169 TCONS\_00011669 TCONS\_00015201 TCONS\_00046839

TCONS\_00016291 TCONS\_00084360 TCONS\_00011670 TCONS\_00080457 TCONS\_00051323 TCONS\_00042415 TCONS\_00077347 TCONS\_00048988 TCONS\_00030324

TCONS\_00079974 TCONS\_00064170 TCONS\_00061421 TCONS\_00046575 TCONS\_00058527 TCONS\_00056084 TCONS\_00079377 TCONS\_00065471 TCONS\_00084847

TCONS\_00028132 TCONS\_00040457 TCONS\_00040366 TCONS\_00044873 TCONS\_00062487 TCONS\_00079599 TCONS\_00088286 TCONS\_00087764 TCONS\_00014610

TCONS\_00036688 TCONS\_00088300 TCONS\_00086269 TCONS\_00007048 TCONS\_00011737 TCONS\_00067094 TCONS\_00077349 TCONS\_00064117 TCONS\_00064119

TCONS\_00078547 TCONS\_00084846 TCONS\_00081970 TCONS\_00022000 TCONS\_00048887 TCONS\_00064504 TCONS\_00080926 TCONS\_00072410 TCONS\_00002435

TCONS\_00081971 TCONS\_00018793 TCONS\_00012580 TCONS\_00028737 TCONS\_00065452 TCONS\_00065611 TCONS\_00014748 TCONS\_00010986 TCONS\_00090963

TCONS\_00030323 TCONS\_00025347 TCONS\_00040434 TCONS\_00090962 TCONS\_00079603 TCONS\_00064857 TCONS\_00081428 TCONS\_00007617 TCONS\_00064760

TCONS\_00044953 TCONS\_00078585 TCONS\_00007615 TCONS\_00011418 TCONS\_00008822 TCONS\_00049442 TCONS\_00081427 TCONS\_00008823 TCONS\_00007614

TCONS\_00002521 TCONS\_00010844 TCONS\_00086270 TCONS\_00060800 TCONS\_00058914 TCONS\_00002330 TCONS\_00061235 TCONS\_00061234 TCONS\_00061236

TCONS\_00040251 TCONS\_00040431 TCONS\_00050865 TCONS\_00064759 TCONS\_00064118 TCONS\_00007811 TCONS\_00007509 TCONS\_00036121 TCONS\_00073130

TCONS\_00027617 TCONS\_00008315 TCONS\_00034001 TCONS\_00048886 TCONS\_00007001 TCONS\_00008668 TCONS\_00082315 TCONS\_00011419 TCONS\_00062301

TCONS\_00046421 TCONS\_00079704 TCONS\_00004183 TCONS\_00064004 TCONS\_00061422 TCONS\_00064116 TCONS\_00033928 TCONS\_00040433 TCONS\_00082714

TCONS\_00034043 TCONS\_00045064 TCONS\_00019919 TCONS\_00020186 TCONS\_00062302 TCONS\_00041194 TCONS\_00024556 TCONS\_00063789 TCONS\_00045392

TCONS\_00004060 TCONS\_00045525 TCONS\_00086001 TCONS\_00028430 TCONS\_00083428 TCONS\_00090878 TCONS\_00007616 TCONS\_00021401 TCONS\_00090028

TCONS\_00045524 TCONS\_00011916 TCONS\_00007094 TCONS\_00028133 TCONS\_00028899 TCONS\_00010634 TCONS\_00067561 TCONS\_00080525 TCONS\_00088690

TCONS\_00062678 TCONS\_00050421 TCONS\_00083214 TCONS\_00083212 TCONS\_00007510 TCONS\_00084356 TCONS\_00034045 TCONS\_00002943 TCONS\_00012581

TCONS\_00049204 TCONS\_00012582 TCONS\_00050275 TCONS\_00036511 TCONS\_00040406 TCONS\_00084549 TCONS\_00064115 TCONS\_00090093 TCONS\_00090095

TCONS\_00086589 TCONS\_00083192 TCONS\_00030269 TCONS\_00020455 TCONS\_00014969 TCONS\_00045176 TCONS\_00041359 TCONS\_00084012 TCONS\_00081958

TCONS\_00081957 TCONS\_00010943 TCONS\_00007264 TCONS\_00079358 TCONS\_00010942 TCONS\_00002055 TCONS\_00089804 TCONS\_00008537 TCONS\_00027908

TCONS\_00081607 TCONS\_00077695 TCONS\_00039936 TCONS\_00007686 TCONS\_00045411 TCONS\_00044893 TCONS\_00067560 TCONS\_00061633 TCONS\_00080821

TCONS\_00004492 TCONS\_00064244 TCONS\_00014970 TCONS\_00059180 TCONS\_00014408 TCONS\_00078603 TCONS\_00018460 TCONS\_00067090 TCONS\_00067091

TCONS\_00045638 TCONS\_00084272 TCONS\_00028092 TCONS\_00087283 TCONS\_00087858 TCONS\_00026169 TCONS\_00018839 TCONS\_00042414 TCONS\_00042773

TCONS\_00014858 TCONS\_00010840 TCONS\_00015989 TCONS\_00058595 TCONS\_00087182 TCONS\_00078481 TCONS\_00082478 TCONS\_00007358 TCONS\_00086447

TCONS\_00040432 TCONS\_00010688 TCONS\_00008924 TCONS\_00079116 TCONS\_00077578 TCONS\_00083757 TCONS\_00067231 TCONS\_00008626 TCONS\_00054825

TCONS\_00048685 TCONS\_00040429 TCONS\_00079670 TCONS\_00083089 TCONS\_00039854 TCONS\_00010931 TCONS\_00087710 TCONS\_00079141 TCONS\_00040855

TCONS\_00002456 TCONS\_00083118 TCONS\_00090656 TCONS\_00056690 TCONS\_00088090 TCONS\_00053685 TCONS\_00044964 TCONS\_00044358 TCONS\_00014968

TCONS\_00015200 TCONS\_00091323 TCONS\_00007727 TCONS\_00082715 TCONS\_00076124 TCONS\_00021452 TCONS\_00079936 TCONS\_00079526 TCONS\_00084619

TCONS\_00084620 TCONS\_00083640 TCONS\_00067757 TCONS\_00002050 TCONS\_00052968 TCONS\_00064009 TCONS\_00052969 TCONS\_00004352 TCONS\_00080822

TCONS\_00078355 TCONS\_00018791 TCONS\_00089342 TCONS\_00012190 TCONS\_00027551 TCONS\_00040250 TCONS\_00061632 TCONS\_00022419 TCONS\_00011520

TCONS\_00040407 TCONS\_00040901 TCONS\_00023035 TCONS\_00078000 TCONS\_00061702 TCONS\_00080590 TCONS\_00081558 TCONS\_00030735 TCONS\_00080499

TCONS\_00041033 TCONS\_00033977 TCONS\_00035030 TCONS\_00061701 TCONS\_00079775 TCONS\_00035803 TCONS\_00080332 TCONS\_00042529 TCONS\_00081297

TCONS\_00034044 TCONS\_00008673 TCONS\_00002470 TCONS\_00004354 TCONS\_00075892 TCONS\_00015067 TCONS\_00026241 TCONS\_00049438 TCONS\_00062730

TCONS\_00007413 TCONS\_00004351 TCONS\_00062677 TCONS\_00086323 TCONS\_00008674 TCONS\_00061494 TCONS\_00082732 TCONS\_00041371 TCONS\_00061630

TCONS\_00061495 TCONS\_00049123 TCONS\_00065063 TCONS\_00002052 TCONS\_00091107 TCONS\_00021859 TCONS\_00004126 TCONS\_00021739 TCONS\_00087917

TCONS\_00053261 TCONS\_00022695 TCONS\_00050638 TCONS\_00011745 TCONS\_00084416 TCONS\_00004125 TCONS\_00007514 TCONS\_00080058 TCONS\_00065057

TCONS\_00036320 TCONS\_00041360 TCONS\_00043188 TCONS\_00052093 TCONS\_00089695 TCONS\_00043120 TCONS\_00039855 TCONS\_00030209 TCONS\_00061078

TCONS\_00002471 TCONS\_00002469 TCONS\_00021858 TCONS\_00028799 TCONS\_00040430 TCONS\_00002157 TCONS\_00091508 TCONS\_00089694 TCONS\_00056354

TCONS\_00077984 TCONS\_00004353 TCONS\_00012008 TCONS\_00079330 TCONS\_00088092 TCONS\_00061493 TCONS\_00026761 TCONS\_00083142 TCONS\_00084136

TCONS\_00045065 TCONS\_00007412 TCONS\_00046891 TCONS\_00027665 TCONS\_00064245 TCONS\_00064725 TCONS\_00054584 TCONS\_00040795 TCONS\_00061079

TCONS\_00083111 TCONS\_00028563 TCONS\_00028523 TCONS\_00077433 TCONS\_00070206 TCONS\_00007513 TCONS\_00091154 TCONS\_00009004 TCONS\_00012118

TCONS\_00077579 TCONS\_00021101 TCONS\_00079210 TCONS\_00079211 TCONS\_00027715 TCONS\_00021498 TCONS\_00003094 TCONS\_00033284 TCONS\_00008878

TCONS\_00040460 TCONS\_00024557 TCONS\_00056249 TCONS\_00018509 TCONS\_00083784 TCONS\_00037053 TCONS\_00056480 TCONS\_00024595 TCONS\_00084818

TCONS\_00049041 TCONS\_00018840 TCONS\_00068580 TCONS\_00067527 TCONS\_00022527 TCONS\_00024594 TCONS\_00034144 TCONS\_00042270 TCONS\_00079527

TCONS\_00082153 TCONS\_00025377 TCONS\_00042775 TCONS\_00015227 TCONS\_00004831 TCONS\_00033413 TCONS\_00003095 TCONS\_00083516 TCONS\_00079165

TCONS\_00042776 TCONS\_00018510 TCONS\_00002468 TCONS\_00002520 TCONS\_00040311 TCONS\_00042271 TCONS\_00020188 TCONS\_00077580 TCONS\_00002051



TCONS\_00040797 TCONS\_00084056 TCONS\_00067627 TCONS\_00024788 TCONS\_00067626 TCONS\_00061193 TCONS\_00091454 TCONS\_00034225 TCONS\_00003624

TCONS\_00078343 TCONS\_00024911 TCONS\_00025612 TCONS\_00078800 TCONS\_00015225 TCONS\_00084190 TCONS\_00041289 TCONS\_00079174 TCONS\_00088285

TCONS\_00015456 TCONS\_00004127 TCONS\_00042027 TCONS\_00035155 TCONS\_00091896 TCONS\_00012119 TCONS\_00083905 TCONS\_00089386 TCONS\_00005339

TCONS\_00062272 TCONS\_00079327 TCONS\_00011215 TCONS\_00030268 TCONS\_00062184 TCONS\_00084934 TCONS\_00018670 TCONS\_00014919 TCONS\_00080050

TCONS\_00004184 TCONS\_00002350 TCONS\_00003096 TCONS\_00016099 TCONS\_00091486 TCONS\_00064006 TCONS\_00019107 TCONS\_00007725 TCONS\_00091485

TCONS\_00026369 TCONS\_00061629 TCONS\_00003702 TCONS\_00007405 TCONS\_00007382 TCONS\_00083131 TCONS\_00059416 TCONS\_00016319 TCONS\_00064246

TCONS\_00016318 TCONS\_00020453 TCONS\_00057695 TCONS\_00063972 TCONS\_00085938 TCONS\_00034178 TCONS\_00082129 TCONS\_00020452 TCONS\_00031304

TCONS\_00018508 TCONS\_00031255 TCONS\_00031305 TCONS\_00053652 TCONS\_00066596 TCONS\_00003295 TCONS\_00040796 TCONS\_00064030 TCONS\_00011004

TCONS\_00084418 TCONS\_00002687 TCONS\_00028431 TCONS\_00024596 TCONS\_00019106 TCONS\_00049440 TCONS\_00040859 TCONS\_00056444 TCONS\_00062675

TCONS\_00064536 TCONS\_00058867 TCONS\_00031256 TCONS\_00086324 TCONS\_00011005 TCONS\_00041370 TCONS\_00061363 TCONS\_00010843 TCONS\_00064806

TCONS\_00080069 TCONS\_00080595 TCONS\_00055843 TCONS\_00083034 TCONS\_00020011 TCONS\_00011343 TCONS\_00067682 TCONS\_00083169 TCONS\_00028488

TCONS\_00086343 TCONS\_00026048 TCONS\_00062300 TCONS\_00004747 TCONS\_00002351 TCONS\_00011344 TCONS\_00091745 TCONS\_00092057 TCONS\_00003332

TCONS\_00087983 TCONS\_00011219 TCONS\_00037647 TCONS\_00014689 TCONS\_00091267 TCONS\_00091268 TCONS\_00002216 TCONS\_00034269 TCONS\_00080589

TCONS\_00080654 TCONS\_00033712 TCONS\_00002984 TCONS\_00025311 TCONS\_00065022 TCONS\_00034289 TCONS\_00080938 TCONS\_00065058 TCONS\_00050858

TCONS\_00002983 TCONS\_00084897 TCONS\_00015226 TCONS\_00052811 TCONS\_00082477 TCONS\_00052810 TCONS\_00045395 TCONS\_00034268 TCONS\_00034123

TCONS\_00010689 TCONS\_00036999 TCONS\_00018887 TCONS\_00022162 TCONS\_00022163 TCONS\_00049427 TCONS\_00055866 TCONS\_00088960 TCONS\_00018900

TCONS\_00010707 TCONS\_00027885 TCONS\_00010716 TCONS\_00091868 TCONS\_00083951 TCONS\_00083952 TCONS\_00053875 TCONS\_00024341 TCONS\_00080937

TCONS\_00053873 TCONS\_00053874 TCONS\_00088773 TCONS\_00077581 TCONS\_00065509 TCONS\_00088301 TCONS\_00027987 TCONS\_00007383 TCONS\_00046255

TCONS\_00046593 TCONS\_00082130 TCONS\_00027625 TCONS\_00002310 TCONS\_00079173 TCONS\_00064285 TCONS\_00089946 TCONS\_00037663 TCONS\_00084221

TCONS\_00007705 TCONS\_00040858 TCONS\_00019105 TCONS\_00067334 TCONS\_00078541 TCONS\_00087778 TCONS\_00007704 TCONS\_00049668 TCONS\_00082131

TCONS\_00055993 TCONS\_00041884 TCONS\_00090531 TCONS\_00050868 TCONS\_00065670 TCONS\_00081045 TCONS\_00049880 TCONS\_00051257 TCONS\_00079525

TCONS\_00053876 TCONS\_00080696 TCONS\_00068059 TCONS\_00027886 TCONS\_00028709 TCONS\_00080492 TCONS\_00046254 TCONS\_00084819 TCONS\_00036235

TCONS\_00090866 TCONS\_00007793 TCONS\_00066993 TCONS\_00012418 TCONS\_00040351 TCONS\_00008644 TCONS\_00021482 TCONS\_00064805 TCONS\_00079597

TCONS\_00084985 TCONS\_00068392 TCONS\_00011392 TCONS\_00040040 TCONS\_00082888 TCONS\_00012416 TCONS\_00012419 TCONS\_00036698 TCONS\_00008907

TCONS\_00057527 TCONS\_00082997 TCONS\_00086364 TCONS\_00067148 TCONS\_00068225 TCONS\_00068391 TCONS\_00079937 TCONS\_00036697 TCONS\_00056518

TCONS\_00050869 TCONS\_00036309 TCONS\_00078781 TCONS\_00030778 TCONS\_00091975 TCONS\_00024342 TCONS\_00036308 TCONS\_00007644 TCONS\_00078207

TCONS\_00050548 TCONS\_00024173 TCONS\_00024351 TCONS\_00025115 TCONS\_00092393 TCONS\_00084550 TCONS\_00008416 TCONS\_00008844 TCONS\_00083517

TCONS\_00012417 TCONS\_00077435 TCONS\_00014713 TCONS\_00024554 TCONS\_00042677 TCONS\_00068223 TCONS\_00051157 TCONS\_00068224 TCONS\_00024399

TCONS\_00004258 TCONS\_00011216 TCONS\_00040860 TCONS\_00087828 TCONS\_00033995 TCONS\_00057526 TCONS\_00022775 TCONS\_00079176 TCONS\_00037695

TCONS\_00024508 TCONS\_00079459 TCONS\_00089287 TCONS\_00024912 TCONS\_00021411 TCONS\_00025310 TCONS\_00015877 TCONS\_00021951 TCONS\_00045368

TCONS\_00078051 TCONS\_00009445 TCONS\_00075143 TCONS\_00024507 TCONS\_00026227 TCONS\_00079220 TCONS\_00019102 TCONS\_00087074 TCONS\_00022765

TCONS\_00082547 TCONS\_00026497 TCONS\_00049754 TCONS\_00087435 TCONS\_00022776 TCONS\_00090661 TCONS\_00077410 TCONS\_00065507 TCONS\_00084506

TCONS\_00024328 TCONS\_00021845 TCONS\_00034301 TCONS\_00052998 TCONS\_00025613 TCONS\_00034507 TCONS\_00075328 TCONS\_00031712 TCONS\_00035041

TCONS\_0002381 TCONS\_00081623 TCONS\_00040435 TCONS\_00077799 TCONS\_00056481 TCONS\_00044990 TCONS\_00068542 TCONS\_00019263 TCONS\_00035077

TCONS\_00077958 TCONS\_00081619 TCONS\_00002768 TCONS\_00062299 TCONS\_00012420 TCONS\_00061233 TCONS\_00009189 TCONS\_00077457 TCONS\_00088466

TCONS\_00008908 TCONS\_00002382 TCONS\_00037435 TCONS\_00033932 TCONS\_00037589 TCONS\_00067476 TCONS\_00040842 TCONS\_00056280 TCONS\_00026049

TCONS\_00046089 TCONS\_00083138 TCONS\_00089146 TCONS\_00007796 TCONS\_00044848 TCONS\_00004292 TCONS\_00007795 TCONS\_00049838 TCONS\_00079291

TCONS\_00039386 TCONS\_00068543 TCONS\_00077505 TCONS\_00031245 TCONS\_00061364 TCONS\_00035050 TCONS\_00048987 TCONS\_00002543 TCONS\_00049839

TCONS\_00027830 TCONS\_00081182 TCONS\_00045265 TCONS\_00003464 TCONS\_00005136 TCONS\_00084373 TCONS\_00002544 TCONS\_00035049 TCONS\_00083407

TCONS\_00065064 TCONS\_00083906 TCONS\_00010706 TCONS\_00040367 TCONS\_00080261 TCONS\_00017968 TCONS\_00041293 TCONS\_00082976 TCONS\_00083168

TCONS\_00088116 TCONS\_00081798 TCONS\_00081282 TCONS\_00079841 TCONS\_00090868 TCONS\_00006652 TCONS\_00007967 TCONS\_00073406 TCONS\_00089252

TCONS\_00010845 TCONS\_00041842 TCONS\_00057158 TCONS\_00045072 TCONS\_00049453 TCONS\_00063973 TCONS\_00065023 TCONS\_00024495 TCONS\_00024248

TCONS\_00065024 TCONS\_00084955 TCONS\_00009102 TCONS\_00077402 TCONS\_00049104 TCONS\_00040352 TCONS\_00084710 TCONS\_00052956 TCONS\_00046526

TCONS\_00078750 TCONS\_00087407 TCONS\_00056056 TCONS\_00091802 TCONS\_00021481 TCONS\_00061353 TCONS\_00043801 TCONS\_00011214 TCONS\_00083161

TCONS\_00088081 TCONS\_00008461 TCONS\_00036310 TCONS\_00082219 TCONS\_00079662 TCONS\_00043983 TCONS\_00079661 TCONS\_00011221 TCONS\_00044875

TCONS\_00008964 TCONS\_00042197 TCONS\_00082970 TCONS\_00078138 TCONS\_00052997 TCONS\_00082157 TCONS\_00081631 TCONS\_00057157 TCONS\_00080183

TCONS\_00008923 TCONS\_00004291 TCONS\_00046843 TCONS\_00041242 TCONS\_00079842 TCONS\_00040681 TCONS\_00078052 TCONS\_00055047 TCONS\_00078137

TCONS\_00031527 TCONS\_00079753 TCONS\_00002911 TCONS\_00007862 TCONS\_00016413 TCONS\_00037636 TCONS\_00009040 TCONS\_00036515 TCONS\_00084155

TCONS\_00017436 TCONS\_00042602 TCONS\_00077817 TCONS\_00012573 TCONS\_00091635 TCONS\_00040682 TCONS\_00079524 TCONS\_00022899 TCONS\_00048984

TCONS\_00011025 TCONS\_00004906 TCONS\_00007726 TCONS\_00082968 TCONS\_00014898 TCONS\_00079523 TCONS\_00027609 TCONS\_00084443 TCONS\_00082391

TCONS\_00046525 TCONS\_00036514 TCONS\_00065056 TCONS\_00083144 TCONS\_00080673 TCONS\_00012263 TCONS\_00026229 TCONS\_00083048 TCONS\_00026228

TCONS\_00040509 TCONS\_00043053 TCONS\_00080068 TCONS\_00092469 TCONS\_00086662 TCONS\_00037725 TCONS\_00026498 TCONS\_00087152 TCONS\_00086337

TCONS\_00004767 TCONS\_00003009 TCONS\_00020096 TCONS\_00042366 TCONS\_00042367 TCONS\_00068604 TCONS\_00012822 TCONS\_00012821 TCONS\_00008909

TCONS\_00011865 TCONS\_00080182 TCONS\_00002383 TCONS\_00086946 TCONS\_00089132 TCONS\_00041201 TCONS\_00056484 TCONS\_00082645 TCONS\_00011383

TCONS\_00043984 TCONS\_00067771 TCONS\_00005057 TCONS\_00040802 TCONS\_00003202 TCONS\_00011378 TCONS\_00084486 TCONS\_00083561 TCONS\_00090986

TCONS\_00046180 TCONS\_00061045 TCONS\_00054119 TCONS\_00034799 TCONS\_00049334 TCONS\_00064255 TCONS\_00080555 TCONS\_00083096 TCONS\_00011719

TCONS\_00091666 TCONS\_00037737 TCONS\_00040473 TCONS\_00054576 TCONS\_00056622 TCONS\_00049723 TCONS\_00082220 TCONS\_00003377 TCONS\_00030567

TCONS\_00056414 TCONS\_00067238 TCONS\_00090628 TCONS\_00019507 TCONS\_00090356 TCONS\_00036301 TCONS\_00071444 TCONS\_00003218 TCONS\_00088082

TCONS\_00079910 TCONS\_00008666 TCONS\_00010792 TCONS\_00078437 TCONS\_00087348 TCONS\_00033570 TCONS\_00034718 TCONS\_00049693 TCONS\_00071209

TCONS\_00060896 TCONS\_00002217 TCONS\_00033569 TCONS\_00034717 TCONS\_00041448 TCONS\_00004185 TCONS\_00028749 TCONS\_00040218 TCONS\_00056413

TCONS\_00087032 TCONS\_00078045 TCONS\_00022172 TCONS\_00089540 TCONS\_00011720 TCONS\_00087985 TCONS\_00086922 TCONS\_00047139 TCONS\_00083970

TCONS\_00007026 TCONS\_00040436 TCONS\_00019264 TCONS\_00086920 TCONS\_00086923 TCONS\_00048813 TCONS\_00025212 TCONS\_00048812 TCONS\_00086402

TCONS\_00024398 TCONS\_00062027 TCONS\_00077883 TCONS\_00079222 TCONS\_00086921 TCONS\_00002384 TCONS\_00062028 TCONS\_00080785 TCONS\_00027932

TCONS\_00054464 TCONS\_00023491 TCONS\_00083641 TCONS\_00071208 TCONS\_00017969 TCONS\_00019265 TCONS\_00078311 TCONS\_00051138 TCONS\_00033288

TCONS\_00091295 TCONS\_00053556 TCONS\_00054465 TCONS\_00081617 TCONS\_00081123 TCONS\_00025895 TCONS\_00082399 TCONS\_00028748 TCONS\_00082340

TCONS\_00081829 TCONS\_00068495 TCONS\_00002137 TCONS\_00004112 TCONS\_00007027 TCONS\_00078665 TCONS\_00084957 TCONS\_00025569 TCONS\_00079175

TCONS\_00018433 TCONS\_00019654 TCONS\_00079156 TCONS\_00033835 TCONS\_00086947 TCONS\_00002496 TCONS\_00033996 TCONS\_00049211 TCONS\_00090166

TCONS\_00065669 TCONS\_00079328 TCONS\_00027425 TCONS\_00047138 TCONS\_00081618 TCONS\_00022144 TCONS\_00064278 TCONS\_00064279 TCONS\_00021524

TCONS\_00068407 TCONS\_00087748 TCONS\_00011026 TCONS\_00024870 TCONS\_00071210 TCONS\_00003604 TCONS\_00033759 TCONS\_00085034 TCONS\_00019104

TCONS\_00067438 TCONS\_00068496 TCONS\_00061713 TCONS\_00078183 TCONS\_00056323 TCONS\_00056322 TCONS\_00067558 TCONS\_00077959 TCONS\_00018661

TCONS\_00089813 TCONS\_00077677 TCONS\_00022873 TCONS\_00042678 TCONS\_00079577 TCONS\_00091994 TCONS\_00030666 TCONS\_00090554 TCONS\_00086663

TCONS\_00087776 TCONS\_00022173 TCONS\_00001126 TCONS\_00086770 TCONS\_00067439 TCONS\_00007274 TCONS\_00067730 TCONS\_00023993 TCONS\_00039734

TCONS\_00076452 TCONS\_00060897 TCONS\_00003259 TCONS\_00064612 TCONS\_00089052 TCONS\_00090683 TCONS\_00080178 TCONS\_00018434 TCONS\_00019656

TCONS\_00090112 TCONS\_00054187 TCONS\_00056164 TCONS\_00053690 TCONS\_00054593 TCONS\_00067526 TCONS\_00036243 TCONS\_00024529 TCONS\_00057259

TCONS\_00018243 TCONS\_00019655 TCONS\_00027566 TCONS\_00040479 TCONS\_00080053 TCONS\_00035042 TCONS\_00056412 TCONS\_00067355 TCONS\_00088560

TCONS\_00033930 TCONS\_00033287 TCONS\_00056163 TCONS\_00080400 TCONS\_00080401 TCONS\_00034122 TCONS\_00057258 TCONS\_00053197 TCONS\_00011024

TCONS\_00064727 TCONS\_00016094 TCONS\_00078184 TCONS\_00088644 TCONS\_00003329 TCONS\_00002211 TCONS\_00028738 TCONS\_00080793 TCONS\_00057641

TCONS\_00010951 TCONS\_00050860 TCONS\_00089814 TCONS\_00065476 TCONS\_00040395 TCONS\_00090629 TCONS\_00064008 TCONS\_00002462 TCONS\_00040217

TCONS\_00003330 TCONS\_00056162 TCONS\_00042721 TCONS\_00042722 TCONS\_00037159 TCONS\_00003562 TCONS\_00081229 TCONS\_00049210 TCONS\_00053842

TCONS\_00088387 TCONS\_00036497 TCONS\_00036498 TCONS\_00082647 TCONS\_00014857 TCONS\_00002340 TCONS\_00002341 TCONS\_00040001 TCONS\_00040804

TCONS\_00011747 TCONS\_00011746 TCONS\_00057637 TCONS\_00010489 TCONS\_00007357 TCONS\_00014855 TCONS\_00014856 TCONS\_00064545 TCONS\_00014943

TCONS\_00056619 TCONS\_00030665 TCONS\_00034508 TCONS\_00043246 TCONS\_00012801 TCONS\_00005279 TCONS\_00018573 TCONS\_00002691 TCONS\_00052805

TCONS\_00060865 TCONS\_00084810 TCONS\_00043247 TCONS\_00015987 TCONS\_00017970 TCONS\_00007923 TCONS\_00080591 TCONS\_00019262 TCONS\_00079172

TCONS\_00070198 TCONS\_00033027 TCONS\_00044043 TCONS\_00034264 TCONS\_00004135 TCONS\_00009039 TCONS\_00089145 TCONS\_00057638 TCONS\_00025180

TCONS\_00036815 TCONS\_00037055 TCONS\_00080639 TCONS\_00090281 TCONS\_00077857 TCONS\_00033066 TCONS\_00083406 TCONS\_00056623 TCONS\_00046303

TCONS\_00044088 TCONS\_00053628 TCONS\_00012339 TCONS\_00002166 TCONS\_00007843 TCONS\_00024318 TCONS\_00033303 TCONS\_00088084 TCONS\_00012514

TCONS\_00049023 TCONS\_00057528 TCONS\_00079723 TCONS\_00037056 TCONS\_00062734 TCONS\_00028071 TCONS\_00049439 TCONS\_00038620 TCONS\_00069401

TCONS\_00003561 TCONS\_00046178 TCONS\_00036375 TCONS\_00037057 TCONS\_00081143 TCONS\_00002342 TCONS\_00042208 TCONS\_00043864 TCONS\_00003672

TCONS\_00042523 TCONS\_00043863 TCONS\_00007521 TCONS\_00042524 TCONS\_00014944 TCONS\_00054357 TCONS\_00000381 TCONS\_00049452 TCONS\_00004293

TCONS\_00046339 TCONS\_00052970 TCONS\_00081142 TCONS\_00057640 TCONS\_00056621 TCONS\_00056483 TCONS\_00065508 TCONS\_00044087 TCONS\_00030032

TCONS\_00040583 TCONS\_00078162 TCONS\_00040582 TCONS\_00027666 TCONS\_00046340 TCONS\_00056620 TCONS\_00083990 TCONS\_00028867 TCONS\_00050859

TCONS\_00057639 TCONS\_00002629 TCONS\_00028524 TCONS\_00083614 TCONS\_00036209 TCONS\_00064788 TCONS\_00080096 TCONS\_00086192 TCONS\_00088846

TCONS\_00082686 TCONS\_00069402 TCONS\_00080582 TCONS\_00024397 TCONS\_00040230 TCONS\_00083064 TCONS\_00008545 TCONS\_00045448 TCONS\_00007181

TCONS\_00062509 TCONS\_00055479 TCONS\_00007271 TCONS\_00001982 TCONS\_00019960 TCONS\_00079546 TCONS\_00022191 TCONS\_00030757 TCONS\_00064339

TCONS\_00049451 TCONS\_00078161 TCONS\_00018276 TCONS\_00078348 TCONS\_00014915 TCONS\_00090631 TCONS\_00089106 TCONS\_00087069 TCONS\_00074246

TCONS\_00003260 TCONS\_00080953 TCONS\_00022192 TCONS\_00052564 TCONS\_00024812 TCONS\_00008665 TCONS\_00007404 TCONS\_00058584 TCONS\_00019543

TCONS\_00084660 TCONS\_00024319 TCONS\_00037613 TCONS\_00036828 TCONS\_00071679 TCONS\_00081091 TCONS\_00004957 TCONS\_00090383 TCONS\_00055474

TCONS\_00015281 TCONS\_00028070 TCONS\_00008211 TCONS\_00007180 TCONS\_00016368 TCONS\_00022716 TCONS\_00024336 TCONS\_00082548 TCONS\_00080638

TCONS\_00019542 TCONS\_00078708 TCONS\_00011589 TCONS\_00025175 TCONS\_00004956 TCONS\_00061993 TCONS\_00044889 TCONS\_00061992 TCONS\_00031693

TCONS\_00007744 TCONS\_00084647 TCONS\_00045407 TCONS\_00078298 TCONS\_00023066 TCONS\_00004784 TCONS\_00011384 TCONS\_00014760 TCONS\_00024332

TCONS\_00006432 TCONS\_00052960 TCONS\_00059948 TCONS\_00003463 TCONS\_00008329 TCONS\_00083157 TCONS\_00008761 TCONS\_00080463 TCONS\_00061991

TCONS\_00071114 TCONS\_00018669 TCONS\_00004455 TCONS\_00002190 TCONS\_00053412 TCONS\_00053413 TCONS\_00005920 TCONS\_00007794 TCONS\_00083950

TCONS\_00084972 TCONS\_00089113 TCONS\_00067779 TCONS\_00077508 TCONS\_00067780 TCONS\_00024813 TCONS\_00028949 TCONS\_00085518 TCONS\_00033967

TCONS\_00021752 TCONS\_00024586 TCONS\_00045125 TCONS\_00005321 TCONS\_00058961 TCONS\_00011588 TCONS\_00014381 TCONS\_00015280 TCONS\_00025594

TCONS\_00053705 TCONS\_00090630 TCONS\_00054598 TCONS\_00016367 TCONS\_00024331 TCONS\_00050591 TCONS\_00084694 TCONS\_00027581 TCONS\_00007235

TCONS\_00035156 TCONS\_00046341 TCONS\_00083750 TCONS\_00091413 TCONS\_00033820 TCONS\_00080570 TCONS\_00082644 TCONS\_00034075 TCONS\_00067413

TCONS\_00087832 TCONS\_00002126 TCONS\_00052961 TCONS\_00033381 TCONS\_00064048 TCONS\_00081102 TCONS\_00027580 TCONS\_00086403 TCONS\_00020184

TCONS\_00042017 TCONS\_00046141 TCONS\_00002630 TCONS\_00054342 TCONS\_00014511 TCONS\_00073698 TCONS\_00028437 TCONS\_00013166 TCONS\_00024585

TCONS\_00040394 TCONS\_00077532 TCONS\_00065533 TCONS\_00083050 TCONS\_00086424 TCONS\_00003593 TCONS\_00091830 TCONS\_00084357 TCONS\_00053627

TCONS\_00053388 TCONS\_00090360 TCONS\_00036725 TCONS\_00022308 TCONS\_00037354 TCONS\_00023046 TCONS\_00027896 TCONS\_00028719 TCONS\_00060898

TCONS\_00030263 TCONS\_00091791 TCONS\_00007806 TCONS\_00025369 TCONS\_00077816 TCONS\_00064393 TCONS\_00002809 TCONS\_00007104 TCONS\_00019060

TCONS\_00021503 TCONS\_00086769 TCONS\_00049925 TCONS\_00065367 TCONS\_00044946 TCONS\_00043865 TCONS\_00079601 TCONS\_00010354 TCONS\_00053653

TCONS\_00064613 TCONS\_00083049 TCONS\_00042786 TCONS\_00064136 TCONS\_00081463 TCONS\_00019061 TCONS\_00042196 TCONS\_00090355 TCONS\_00016294

TCONS\_00082055 TCONS\_00079530 TCONS\_00024913 TCONS\_00007844 TCONS\_00067412 TCONS\_00013095 TCONS\_00025370 TCONS\_00056482 TCONS\_00082322

TCONS\_00084518 TCONS\_00056132 TCONS\_00056133 TCONS\_00004105 TCONS\_00090845 TCONS\_00090846 TCONS\_00046257 TCONS\_00008815 TCONS\_00080794

TCONS\_00023994 TCONS\_00007272 TCONS\_00083372 TCONS\_00007411 TCONS\_00015203 TCONS\_00007030 TCONS\_00004611 TCONS\_00034583 TCONS\_00064340

TCONS\_00065307 TCONS\_00077858 TCONS\_00079602 TCONS\_00044042 TCONS\_00080366 TCONS\_00064003 TCONS\_00046309 TCONS\_00043802 TCONS\_00081039

TCONS\_00036692 TCONS\_00014592 TCONS\_00019094 TCONS\_00027829 TCONS\_00048684 TCONS\_00046256 TCONS\_00002160 TCONS\_00008922 TCONS\_00078108

TCONS\_00003390 TCONS\_00026230 TCONS\_00037092 TCONS\_00004488 TCONS\_00033515 TCONS\_00024561 TCONS\_00054024 TCONS\_00081117 TCONS\_00067752

TCONS\_00045955 TCONS\_00080051 TCONS\_00018836 TCONS\_00039816 TCONS\_00011408 TCONS\_00008546 TCONS\_00005921 TCONS\_00092067 TCONS\_00026505

TCONS\_00028473 TCONS\_00024400 TCONS\_00004483 TCONS\_00078299 TCONS\_00036035 TCONS\_00086279 TCONS\_00049481 TCONS\_00050906 TCONS\_00039817

TCONS\_00018239 TCONS\_00036392 TCONS\_00051246 TCONS\_00080508 TCONS\_00054023 TCONS\_00009444 TCONS\_00081321 TCONS\_00020062 TCONS\_00056700

TCONS\_00010674 TCONS\_00002805 TCONS\_00055475 TCONS\_00061061 TCONS\_00007538 TCONS\_00046974 TCONS\_00037036 TCONS\_00008777 TCONS\_00057268

TCONS\_00057349 TCONS\_00072132 TCONS\_00080232 TCONS\_00024872 TCONS\_00039820 TCONS\_00025241 TCONS\_00046975 TCONS\_00002756 TCONS\_00024871

TCONS\_00040128 TCONS\_00023642 TCONS\_00059550 TCONS\_00083470 TCONS\_00078109 TCONS\_00014854 TCONS\_00081711 TCONS\_00034302 TCONS\_00087366

TCONS\_00062777 TCONS\_00067414 TCONS\_00082786 TCONS\_00021991 TCONS\_00022898 TCONS\_00072893 TCONS\_00061375 TCONS\_00021502 TCONS\_00019286

TCONS\_00004042 TCONS\_00028072 TCONS\_00008080 TCONS\_00012164 TCONS\_00059021 TCONS\_00015911 TCONS\_00041845 TCONS\_00084995 TCONS\_00012472

TCONS\_00018244 TCONS\_00056287 TCONS\_00064500 TCONS\_00024901 TCONS\_00040281 TCONS\_00089152 TCONS\_00061060 TCONS\_00022893 TCONS\_00088647

TCONS\_00040201 TCONS\_00079568 TCONS\_00007729 TCONS\_00079218 TCONS\_00088648 TCONS\_00021793 TCONS\_00075107 TCONS\_00084359 TCONS\_00004128

TCONS\_00045820 TCONS\_00023067 TCONS\_00082500 TCONS\_00018958 TCONS\_00034664 TCONS\_00084358 TCONS\_00041843 TCONS\_00043800 TCONS\_00068599

TCONS\_00010902 TCONS\_00061522 TCONS\_00056301 TCONS\_00091581 TCONS\_00033514 TCONS\_00058715 TCONS\_00067553 TCONS\_00034665 TCONS\_00034666

TCONS\_00055192 TCONS\_00012542 TCONS\_00025596 TCONS\_00009160 TCONS\_00077401 TCONS\_00024652 TCONS\_00068600 TCONS\_00066006 TCONS\_00086732



TCONS\_00011285 TCONS\_00079589 TCONS\_00037847 TCONS\_00007728 TCONS\_00081457 TCONS\_00090916 TCONS\_00048824 TCONS\_00004501 TCONS\_00004502

TCONS\_00013962 TCONS\_00048825 TCONS\_00002026 TCONS\_00028262 TCONS\_00067554 TCONS\_00030640 TCONS\_00031586 TCONS\_00031587 TCONS\_00077914

TCONS\_00068601 TCONS\_00034694 TCONS\_00014466 TCONS\_00086731 TCONS\_00045393 TCONS\_00061100 TCONS\_00091373 TCONS\_00056300 TCONS\_00031694

TCONS\_00084375 TCONS\_00077915 TCONS\_00028679 TCONS\_00027855 TCONS\_00078518 TCONS\_00030639 TCONS\_00061498 TCONS\_00084074 TCONS\_00002676

TCONS\_00081546 TCONS\_00012261 TCONS\_00079598 TCONS\_00002690 TCONS\_00080816 TCONS\_00060285 TCONS\_00046062 TCONS\_00075106 TCONS\_00003611

TCONS\_00036391 TCONS\_00061352 TCONS\_00054105 TCONS\_00061453 TCONS\_00090867 TCONS\_00011023 TCONS\_00061452 TCONS\_00066534 TCONS\_00015780

TCONS\_00042252 TCONS\_00081216 TCONS\_00081217 TCONS\_00061454 TCONS\_00061165 TCONS\_00065562 TCONS\_00090077 TCONS\_00083030 TCONS\_00083031

TCONS\_00064544 TCONS\_00040280 TCONS\_00061733 TCONS\_00008082 TCONS\_00062074 TCONS\_00026381 TCONS\_00022872 TCONS\_00002699 TCONS\_00088748

TCONS\_00069255 TCONS\_00082757 TCONS\_00015264 TCONS\_00072277 TCONS\_00050710 TCONS\_00068266 TCONS\_00015263 TCONS\_00057000 TCONS\_00082301

TCONS\_00033823 TCONS\_00081710 TCONS\_00018194 TCONS\_00061757 TCONS\_00082933 TCONS\_00025468 TCONS\_00007805 TCONS\_00088046 TCONS\_00052066

TCONS\_00018193 TCONS\_00083032 TCONS\_00090617 TCONS\_00079693 TCONS\_00009819 TCONS\_00056182 TCONS\_00026396 TCONS\_00081458 TCONS\_00055855

TCONS\_00055856 TCONS\_00057020 TCONS\_00057392 TCONS\_00057393 TCONS\_00092573 TCONS\_00042249 TCONS\_00033734 TCONS\_00034194 TCONS\_00018195

TCONS\_00009820 TCONS\_00021794 TCONS\_00070180 TCONS\_00080376 TCONS\_00008081 TCONS\_00082984 TCONS\_00061351 TCONS\_00049200 TCONS\_00049201

TCONS\_00039990 TCONS\_00062423 TCONS\_00033822 TCONS\_00064672 TCONS\_00042020 TCONS\_00040202 TCONS\_00011523 TCONS\_00001980 TCONS\_00054104

TCONS\_00060968 TCONS\_00078960 TCONS\_00025155 TCONS\_00012642 TCONS\_00052566 TCONS\_00089050 TCONS\_00014707 TCONS\_00031276 TCONS\_00084127

TCONS\_00008046 TCONS\_00024781 TCONS\_00021526 TCONS\_00008760 TCONS\_00049621 TCONS\_00053629 TCONS\_00030163 TCONS\_00026061 TCONS\_00075217

TCONS\_0004603 TCONS\_00068757 TCONS\_00000988 TCONS\_00067301 TCONS\_00008045 TCONS\_00060969 TCONS\_00056324 TCONS\_00026503 TCONS\_00062084

TCONS\_00078961 TCONS\_00048927 TCONS\_00034698 TCONS\_00021258 TCONS\_00033542 TCONS\_00012259 TCONS\_00062251 TCONS\_00055191 TCONS\_00012260

TCONS\_00089047 TCONS\_00028474 TCONS\_00041373 TCONS\_00077890 TCONS\_00079224 TCONS\_00051963 TCONS\_00026380 TCONS\_00030781 TCONS\_00002489

TCONS\_00004367 TCONS\_00089046 TCONS\_00026237 TCONS\_00022216 TCONS\_00087616 TCONS\_00064294 TCONS\_00013593 TCONS\_00014897 TCONS\_00024889

TCONS\_00084811 TCONS\_00051964 TCONS\_00067506 TCONS\_00086913 TCONS\_00067507 TCONS\_00074456 TCONS\_00082756 TCONS\_00031715 TCONS\_00077584

TCONS\_00086452 TCONS\_00003997 TCONS\_00066489 TCONS\_00026379 TCONS\_00064193 TCONS\_00023083 TCONS\_00002158 TCONS\_00004692 TCONS\_00014593

TCONS\_00015245 TCONS\_00061156 TCONS\_00025907 TCONS\_00024900 TCONS\_00002497 TCONS\_00064310 TCONS\_00083767 TCONS\_00042198 TCONS\_00022294

TCONS\_00068756 TCONS\_00020097 TCONS\_00023995 TCONS\_00061557 TCONS\_00020546 TCONS\_00083135 TCONS\_00072131 TCONS\_00057478 TCONS\_00051292

TCONS\_00011166 TCONS\_00064791 TCONS\_00035128 TCONS\_00061435 TCONS\_00064792 TCONS\_00081044 TCONS\_00080154 TCONS\_00003675 TCONS\_00023101

TCONS\_00083134 TCONS\_00021602 TCONS\_00042288 TCONS\_00049141 TCONS\_00080287 TCONS\_00045162 TCONS\_00064309 TCONS\_00074513 TCONS\_00053066

TCONS\_00074514 TCONS\_00091579 TCONS\_00042287 TCONS\_00050922 TCONS\_00087102 TCONS\_00035036 TCONS\_00049441 TCONS\_00040126 TCONS\_00042130

TCONS\_00018238 TCONS\_00083560 TCONS\_00091984 TCONS\_00084693 TCONS\_00090615 TCONS\_00062249 TCONS\_00062250 TCONS\_00084946 TCONS\_00024890

TCONS\_00068095 TCONS\_00079532 TCONS\_00049415 TCONS\_00011546 TCONS\_00040127 TCONS\_00061903 TCONS\_00062494 TCONS\_00088184 TCONS\_00052565

TCONS\_00040219 TCONS\_00048020 TCONS\_00069467 TCONS\_00085023 TCONS\_00087405 TCONS\_00087406 TCONS\_00079595 TCONS\_00018675 TCONS\_00007275

TCONS\_00028042 TCONS\_00068603 TCONS\_00079594 TCONS\_00007724 TCONS\_00020023 TCONS\_00061436 TCONS\_00082327 TCONS\_00030241 TCONS\_00068498

TCONS\_00044766 TCONS\_00016329 TCONS\_00067557 TCONS\_00087987 TCONS\_00011021 TCONS\_00079771 TCONS\_00007276 TCONS\_00018676 TCONS\_00028663

TCONS\_00079533 TCONS\_00011022 TCONS\_00068755 TCONS\_00087215 TCONS\_00011631 TCONS\_00043191 TCONS\_00037604 TCONS\_00049457 TCONS\_00030242

TCONS\_00036128 TCONS\_00078236 TCONS\_00025615 TCONS\_00067348 TCONS\_00082265 TCONS\_00078511 TCONS\_00065667 TCONS\_00087988 TCONS\_00061205

TCONS\_00012660 TCONS\_00018524 TCONS\_00088037 TCONS\_00005922 TCONS\_00049768 TCONS\_00026060 TCONS\_00066001 TCONS\_00059735 TCONS\_00039988

TCONS\_00090772 TCONS\_00086660 TCONS\_00067031 TCONS\_00067029 TCONS\_00067030 TCONS\_00068094 TCONS\_00068093 TCONS\_00062722 TCONS\_00062723

TCONS\_00011250 TCONS\_00039770 TCONS\_00068092 TCONS\_00019822 TCONS\_00080079 TCONS\_00008979 TCONS\_00004085 TCONS\_00064392 TCONS\_00031224

TCONS\_00031225 TCONS\_00055836 TCONS\_00088115 TCONS\_00071250 TCONS\_00024563 TCONS\_00086661 TCONS\_00030514 TCONS\_00019614 TCONS\_00085019

TCONS\_00030860 TCONS\_00041098 TCONS\_00020176 TCONS\_00015609 TCONS\_00044884 TCONS\_00060888 TCONS\_00060889 TCONS\_00067032 TCONS\_00039130

TCONS\_00080017 TCONS\_00081807 TCONS\_00089679 TCONS\_00003385 TCONS\_00003386 TCONS\_00041802 TCONS\_00024915 TCONS\_00008978 TCONS\_00018085

TCONS\_00030861 TCONS\_00081808 TCONS\_00022538 TCONS\_00022539 TCONS\_00090775 TCONS\_00004484 TCONS\_00065238 TCONS\_00012444 TCONS\_00010257

TCONS\_00011393 TCONS\_00014362 TCONS\_00049897 TCONS\_00082760 TCONS\_00084599 TCONS\_00064225 TCONS\_00091730 TCONS\_00033034 TCONS\_00049318

TCONS\_00084380 TCONS\_00068483 TCONS\_00079905 TCONS\_00091104 TCONS\_00037848 TCONS\_00078959 TCONS\_00051041 TCONS\_00087615 TCONS\_00052503

TCONS\_00019374 TCONS\_00011394 TCONS\_00088704 TCONS\_00085020 TCONS\_00006535 TCONS\_00049317 TCONS\_00078621 TCONS\_00087295 TCONS\_00083597

TCONS\_00044916 TCONS\_00019911 TCONS\_00077913 TCONS\_00018780 TCONS\_00019912 TCONS\_00062105 TCONS\_00027570 TCONS\_00087871 TCONS\_00044787

TCONS\_00079915 TCONS\_00070621 TCONS\_00022896 TCONS\_00060991 TCONS\_00088442 TCONS\_00024570 TCONS\_00061716 TCONS\_00061717 TCONS\_00022995

TCONS\_00082309 TCONS\_00077784 TCONS\_00032696 TCONS\_00090087 TCONS\_00046915 TCONS\_00084434 TCONS\_00067310 TCONS\_00038072 TCONS\_00039821

TCONS\_00042368 TCONS\_00082167 TCONS\_00037954 TCONS\_00022968 TCONS\_00002729 TCONS\_00009259 TCONS\_00031659 TCONS\_00002677 TCONS\_00009188

TCONS\_00068372 TCONS\_00024610 TCONS\_00041404 TCONS\_00082561 TCONS\_00061166 TCONS\_00011112 TCONS\_00051269 TCONS\_00021012 TCONS\_00019375

TCONS\_00022994 TCONS\_00077783 TCONS\_00077782 TCONS\_00090291 TCONS\_00002125 TCONS\_00039848 TCONS\_00022724 TCONS\_00067309 TCONS\_00002124

TCONS\_00019867 TCONS\_00005356 TCONS\_00062076 TCONS\_00025386 TCONS\_00070622 TCONS\_00021489 TCONS\_00022599 TCONS\_00041801 TCONS\_00060447

TCONS\_00039769 TCONS\_00019866 TCONS\_00087883 TCONS\_00002932 TCONS\_00090844 TCONS\_00061712 TCONS\_00079949 TCONS\_00012555 TCONS\_00018240

TCONS\_00044799 TCONS\_00068360 TCONS\_00004189 TCONS\_00083507 TCONS\_00010900 TCONS\_00079914 TCONS\_00044384 TCONS\_00079811 TCONS\_00064080

TCONS\_00084170 TCONS\_00075223 TCONS\_00079496 TCONS\_00088042 TCONS\_00067753 TCONS\_00058937 TCONS\_00071041 TCONS\_00017497 TCONS\_00044904

TCONS\_00084699 TCONS\_00042903 TCONS\_00004711 TCONS\_00033884 TCONS\_00022111 TCONS\_00036932 TCONS\_00061362 TCONS\_00042983 TCONS\_00079810

TCONS\_00087218 TCONS\_00049732 TCONS\_00046718 TCONS\_00091796 TCONS\_00087217 TCONS\_00080664 TCONS\_00091795 TCONS\_00050849 TCONS\_00011286

TCONS\_00018908 TCONS\_00046973 TCONS\_00059672 TCONS\_00040692 TCONS\_00068497 TCONS\_00079534 TCONS\_00049234 TCONS\_00068317 TCONS\_00067442

TCONS\_00046798 TCONS\_00057242 TCONS\_00090288 TCONS\_00057241 TCONS\_00034239 TCONS\_00087219 TCONS\_00057425 TCONS\_00011542 TCONS\_00061743

TCONS\_00041800 TCONS\_00009020 TCONS\_00078185 TCONS\_00022112 TCONS\_00070171 TCONS\_00001555 TCONS\_00053132 TCONS\_00041109 TCONS\_00054406

TCONS\_00012630 TCONS\_00022895 TCONS\_00046867 TCONS\_00091462 TCONS\_00016778 TCONS\_00081283 TCONS\_00089253 TCONS\_00063964 TCONS\_00068499

TCONS\_00051271 TCONS\_00008740 TCONS\_00025156 TCONS\_00086948 TCONS\_00049235 TCONS\_00033925 TCONS\_00073984 TCONS\_00008415 TCONS\_00033988

TCONS\_00087742 TCONS\_00030165 TCONS\_00003673 TCONS\_00086287 TCONS\_00074458 TCONS\_00083709 TCONS\_00022293 TCONS\_00042904 TCONS\_00079387

TCONS\_00026375 TCONS\_00035530 TCONS\_00081284 TCONS\_00012367 TCONS\_00001253 TCONS\_00007247 TCONS\_00058803 TCONS\_00053091 TCONS\_00042016

TCONS\_00084845 TCONS\_00048929 TCONS\_00083596 TCONS\_00040691 TCONS\_00011165 TCONS\_00042615 TCONS\_00041403 TCONS\_00011222 TCONS\_00056638

TCONS\_00030164 TCONS\_00065329 TCONS\_00021429 TCONS\_00064347 TCONS\_00083207 TCONS\_00021102 TCONS\_00043085 TCONS\_00015619 TCONS\_00082325

TCONS\_00074256 TCONS\_00015178 TCONS\_00083508 TCONS\_00041364 TCONS\_00064807 TCONS\_00077912 TCONS\_00046799 TCONS\_00008664 TCONS\_00084407

TCONS\_00074848 TCONS\_00044915 TCONS\_00083853 TCONS\_00083266 TCONS\_00090771 TCONS\_00082755 TCONS\_00077512 TCONS\_00083854 TCONS\_00074650

TCONS\_00065330 TCONS\_00004489 TCONS\_00053032 TCONS\_00019287 TCONS\_00054078 TCONS\_00053486 TCONS\_00065014 TCONS\_00067441 TCONS\_00003612

TCONS\_00018994 TCONS\_00088441 TCONS\_00054561 TCONS\_00053650 TCONS\_00022113 TCONS\_00091488 TCONS\_00065694 TCONS\_00056468 TCONS\_00053000

TCONS\_00012325 TCONS\_00020076 TCONS\_00050783 TCONS\_00017574 TCONS\_00018861 TCONS\_00070620 TCONS\_00020092 TCONS\_00020093 TCONS\_00049769

TCONS\_00044903 TCONS\_00079535 TCONS\_00004421 TCONS\_00011284 TCONS\_00012471 TCONS\_00079388 TCONS\_00045423 TCONS\_00041160 TCONS\_00088701

TCONS\_00043111 TCONS\_00030218 TCONS\_00031264 TCONS\_00041237 TCONS\_00064488 TCONS\_00065629 TCONS\_00046825 TCONS\_00084119 TCONS\_00067060

TCONS\_00091684 TCONS\_00057244 TCONS\_00042132 TCONS\_00061350 TCONS\_00078110 TCONS\_00057516 TCONS\_00067440 TCONS\_00079310 TCONS\_00091018

TCONS\_00091019 TCONS\_00091020 TCONS\_00087210 TCONS\_00034016 TCONS\_00035068 TCONS\_00078623 TCONS\_00046096 TCONS\_00005346 TCONS\_00007502

TCONS\_00078249 TCONS\_00035069 TCONS\_00092044 TCONS\_00049357 TCONS\_00035216 TCONS\_00091367 TCONS\_00080617 TCONS\_00078515 TCONS\_00008377

TCONS\_00056156 TCONS\_00056157 TCONS\_00065270 TCONS\_00041238 TCONS\_00067027 TCONS\_00018320 TCONS\_00013183 TCONS\_00076539 TCONS\_00018321

TCONS\_00067479 TCONS\_00057243 TCONS\_00057245 TCONS\_00015873 TCONS\_00019990 TCONS\_00007921 TCONS\_00009084 TCONS\_00056021 TCONS\_00063999

TCONS\_00079373 TCONS\_00017591 TCONS\_00002912 TCONS\_00014553 TCONS\_00067028 TCONS\_00010823 TCONS\_00031519 TCONS\_00068226 TCONS\_00065999

TCONS\_00086379 TCONS\_00003608 TCONS\_00043086 TCONS\_00043087 TCONS\_00053651 TCONS\_00070179 TCONS\_00004298 TCONS\_00065052 TCONS\_00065269

TCONS\_00022511 TCONS\_00065051 TCONS\_00079386 TCONS\_00081712 TCONS\_00050784 TCONS\_00014552 TCONS\_00037014 TCONS\_00060961 TCONS\_00002627

TCONS\_00078517 TCONS\_00030273 TCONS\_00081714 TCONS\_00018820 TCONS\_00041724 TCONS\_00081713 TCONS\_00078516 TCONS\_00024282 TCONS\_00044143

TCONS\_00063998 TCONS\_00067349 TCONS\_00054013 TCONS\_00030535 TCONS\_00030536 TCONS\_00060960 TCONS\_00062071 TCONS\_00062072 TCONS\_00050811

TCONS\_00091683 TCONS\_00089608 TCONS\_00046059 TCONS\_00004530 TCONS\_00004531 TCONS\_00004532 TCONS\_00088626 TCONS\_00050779 TCONS\_00056470

TCONS\_00019939 TCONS\_00063997 TCONS\_00064262 TCONS\_00078705 TCONS\_00004529 TCONS\_00017519 TCONS\_00048771 TCONS\_00083598 TCONS\_00073314

TCONS\_00064202 TCONS\_00039718 TCONS\_00085126 TCONS\_00073313 TCONS\_00089607 TCONS\_00067151 TCONS\_00059795 TCONS\_00081589 TCONS\_00011490

TCONS\_00055858 TCONS\_00040624 TCONS\_00046095 TCONS\_00059796 TCONS\_00026853 TCONS\_00064203 TCONS\_00041487 TCONS\_00041488 TCONS\_00015752

TCONS\_00033250 TCONS\_00062495 TCONS\_00041489 TCONS\_00086483 TCONS\_00090584 TCONS\_00058894 TCONS\_00058337 TCONS\_00043288 TCONS\_00043289

TCONS\_00016444 TCONS\_00064837 TCONS\_00043290 TCONS\_00041905 TCONS\_00018377 TCONS\_00046179 TCONS\_00053014 TCONS\_00091366 TCONS\_00062173

TCONS\_00015409 TCONS\_00015751 TCONS\_00058545 TCONS\_00061339 TCONS\_00087129 TCONS\_00050648 TCONS\_00007300 TCONS\_00007301 TCONS\_00077471

TCONS\_00008567 TCONS\_00008568 TCONS\_00055955 TCONS\_00088588 TCONS\_00039520 TCONS\_00039368 TCONS\_00011742 TCONS\_00015408 TCONS\_00062174

TCONS\_00087209 TCONS\_00027689 TCONS\_00045266 TCONS\_00019514 TCONS\_00044014 TCONS\_00046479 TCONS\_00090688 TCONS\_00067421 TCONS\_00077359

TCONS\_00083852 TCONS\_00042556 TCONS\_00034006 TCONS\_00011744 TCONS\_00041273 TCONS\_00083343 TCONS\_00054832 TCONS\_00050649 TCONS\_00080373

TCONS\_00088587 TCONS\_00056835 TCONS\_00056279 TCONS\_00069007 TCONS\_00003346 TCONS\_00014708 TCONS\_00015779 TCONS\_00056257 TCONS\_00083149

TCONS\_00002794 TCONS\_00080532 TCONS\_00077472 TCONS\_00040259 TCONS\_00040258 TCONS\_00056048 TCONS\_00011743 TCONS\_00041517 TCONS\_00001372

TCONS\_00008523 TCONS\_00040327 TCONS\_00057022 TCONS\_00089414 TCONS\_00069006 TCONS\_00057517 TCONS\_00083707 TCONS\_00057153 TCONS\_00012820

TCONS\_00057152 TCONS\_00059677 TCONS\_00022255 TCONS\_00014798 TCONS\_00077865 TCONS\_00039279 TCONS\_00049138 TCONS\_00036826 TCONS\_00018659

TCONS\_00045598 TCONS\_00009090 TCONS\_00012819 TCONS\_00079639 TCONS\_00038095 TCONS\_00061063 TCONS\_00080118 TCONS\_00043026 TCONS\_00021719

TCONS\_00041374 TCONS\_00087364 TCONS\_00068399 TCONS\_00083269 TCONS\_00012818 TCONS\_00003345 TCONS\_00033826 TCONS\_00090232 TCONS\_00022003

TCONS\_00013045 TCONS\_00056320 TCONS\_00049124 TCONS\_00013046 TCONS\_00080530 TCONS\_00080531 TCONS\_00067373 TCONS\_00045155 TCONS\_00077495

TCONS\_00009091 TCONS\_00079229 TCONS\_00061594 TCONS\_00045005 TCONS\_00037319 TCONS\_00003119 TCONS\_00004594 TCONS\_00030525 TCONS\_00067680

TCONS\_00005027 TCONS\_00040701 TCONS\_00020680 TCONS\_00078156 TCONS\_00005026 TCONS\_00005028 TCONS\_00055567 TCONS\_00024897 TCONS\_00035217

TCONS\_00086392 TCONS\_00007248 TCONS\_00057072 TCONS\_00062641 TCONS\_00040907 TCONS\_00040908 TCONS\_00005374 TCONS\_00082262 TCONS\_00088018

TCONS\_00040700 TCONS\_00061592 TCONS\_00091200 TCONS\_00088130 TCONS\_00052774 TCONS\_00024793 TCONS\_00014428 TCONS\_00061900 TCONS\_00061902

TCONS\_00061593 TCONS\_00040381 TCONS\_00049767 TCONS\_00039902 TCONS\_00017306 TCONS\_00043192 TCONS\_00034240 TCONS\_00030099 TCONS\_00040197

TCONS\_00050273 TCONS\_00008566 TCONS\_00012694 TCONS\_00015659 TCONS\_00015087 TCONS\_00003343 TCONS\_00080074 TCONS\_00075327 TCONS\_00042352

TCONS\_00003344 TCONS\_00083934 TCONS\_00003342 TCONS\_00083609 TCONS\_00013960 TCONS\_00045708 TCONS\_00036675 TCONS\_00040672 TCONS\_00080778

TCONS\_00021527 TCONS\_00077422 TCONS\_00089415 TCONS\_00024725 TCONS\_00061689 TCONS\_00049863 TCONS\_00079228 TCONS\_00012632 TCONS\_00064206

TCONS\_00004020 TCONS\_00030098 TCONS\_00064207 TCONS\_00014386 TCONS\_00023118 TCONS\_00061901 TCONS\_00049378 TCONS\_00001998 TCONS\_00045025

TCONS\_00061286 TCONS\_00090096 TCONS\_00082263 TCONS\_00079628 TCONS\_00088071 TCONS\_00042220 TCONS\_00006546 TCONS\_00071598 TCONS\_00084974

TCONS\_00078044 TCONS\_00090060 TCONS\_00031154 TCONS\_00042219 TCONS\_00045024 TCONS\_00041365 TCONS\_00091253 TCONS\_00064838 TCONS\_00060583

TCONS\_00050822 TCONS\_00025160 TCONS\_00084381 TCONS\_00088649 TCONS\_00062124 TCONS\_00055951 TCONS\_00021731 TCONS\_00024789 TCONS\_00020695

TCONS\_00067939 TCONS\_00061287 TCONS\_00046506 TCONS\_00088533 TCONS\_00005025 TCONS\_00058959 TCONS\_00082558 TCONS\_00051881 TCONS\_00067990

TCONS\_00084629 TCONS\_00072836 TCONS\_00084825 TCONS\_00047396 TCONS\_00008067 TCONS\_00061013 TCONS\_00007299 TCONS\_00079714 TCONS\_00061288

TCONS\_00063804 TCONS\_00059454 TCONS\_00077358 TCONS\_00066932 TCONS\_00079521 TCONS\_00003738 TCONS\_00005372 TCONS\_00005373 TCONS\_00059495

TCONS\_00039826 TCONS\_00047395 TCONS\_00056834 TCONS\_00081450 TCONS\_00078367 TCONS\_00056833 TCONS\_00083608 TCONS\_00056832 TCONS\_00059205

TCONS\_00059206 TCONS\_00080300 TCONS\_00057649 TCONS\_00057650 TCONS\_00090949 TCONS\_00007050 TCONS\_00043216 TCONS\_00081833 TCONS\_00002673

TCONS\_00045023 TCONS\_00058728 TCONS\_00089389 TCONS\_00042628 TCONS\_00087083 TCONS\_00003341 TCONS\_00022292 TCONS\_00011545 TCONS\_00022530

TCONS\_00041161 TCONS\_00011493 TCONS\_00036127 TCONS\_00041254 TCONS\_00024724 TCONS\_00031810 TCONS\_00054251 TCONS\_00079464 TCONS\_00001188

TCONS\_00051880 TCONS\_00058621 TCONS\_00002985 TCONS\_00090430 TCONS\_00088278 TCONS\_00090431 TCONS\_00082179 TCONS\_00004481 TCONS\_00089699

TCONS\_00015222 TCONS\_00082028 TCONS\_00071072 TCONS\_00076474 TCONS\_00030100 TCONS\_00016189 TCONS\_00016317 TCONS\_00002493 TCONS\_00011492

TCONS\_00021979 TCONS\_00044909 TCONS\_00040690 TCONS\_00010899 TCONS\_00007625 TCONS\_00008066 TCONS\_00054441 TCONS\_00015086 TCONS\_00041402

TCONS\_00009177 TCONS\_00022894 TCONS\_00055857 TCONS\_00031730 TCONS\_00084824 TCONS\_00091878 TCONS\_00025500 TCONS\_00042660 TCONS\_00008065

TCONS\_00052379 TCONS\_00082359 TCONS\_00090097 TCONS\_00025460 TCONS\_00057221 TCONS\_00064878 TCONS\_00065729 TCONS\_00089700 TCONS\_00046396

TCONS\_00007941 TCONS\_00087365 TCONS\_00057222 TCONS\_00082323 TCONS\_00063373 TCONS\_00031520 TCONS\_00024770 TCONS\_00035122 TCONS\_00025159

TCONS\_00051346 TCONS\_00054355 TCONS\_00079972 TCONS\_00083837 TCONS\_00063374 TCONS\_00012415 TCONS\_00042199 TCONS\_00072478 TCONS\_00023028

TCONS\_00081847 TCONS\_00053854 TCONS\_00054118 TCONS\_00056363 TCONS\_00067026 TCONS\_00068091 TCONS\_00030537 TCONS\_00023686 TCONS\_00080230

TCONS\_00024572 TCONS\_00022126 TCONS\_00031275 TCONS\_00033593 TCONS\_00056364 TCONS\_00056365 TCONS\_00057424 TCONS\_00022115 TCONS\_00050780

TCONS\_00043259 TCONS\_00003220 TCONS\_00024746 TCONS\_00023001 TCONS\_00011213 TCONS\_00078414 TCONS\_00043258 TCONS\_00034727 TCONS\_00057021

TCONS\_00042039 TCONS\_00075744 TCONS\_00018603 TCONS\_00081927 TCONS\_00040017 TCONS\_00069448 TCONS\_00043257 TCONS\_00042040 TCONS\_00040015

TCONS\_00040018 TCONS\_00040016 TCONS\_00089784 TCONS\_00089785 TCONS\_00060286 TCONS\_00082101 TCONS\_00053245 TCONS\_00042041 TCONS\_00075088

TCONS\_00025470 TCONS\_00004369 TCONS\_00068158 TCONS\_00057344 TCONS\_00015085 TCONS\_00013835 TCONS\_00082761 TCONS\_00090101 TCONS\_00002674

TCONS\_00009983 TCONS\_00090100 TCONS\_00033594 TCONS\_00007868 TCONS\_00058623 TCONS\_00023933 TCONS\_00007869 TCONS\_00081780 TCONS\_00009045



TCONS\_00016207 TCONS\_00040572 TCONS\_00049199 TCONS\_00050696 TCONS\_00056278 TCONS\_00080991 TCONS\_00006561 TCONS\_00037786 TCONS\_00009046

TCONS\_00037793 TCONS\_00022148 TCONS\_00025529 TCONS\_00000508 TCONS\_00026543 TCONS\_00059132 TCONS\_00037593 TCONS\_00053010 TCONS\_00023685

TCONS\_00015023 TCONS\_00091822 TCONS\_00040673 TCONS\_00083708 TCONS\_00022149 TCONS\_00041459 TCONS\_00041458 TCONS\_00022609 TCONS\_00075347

TCONS\_00081090 TCONS\_00078519 TCONS\_00034740 TCONS\_00021915 TCONS\_00020862 TCONS\_00053446 TCONS\_00089504 TCONS\_00088836 TCONS\_00015235

TCONS\_00070795 TCONS\_00046209 TCONS\_00079843 TCONS\_00082324 TCONS\_00042671 TCONS\_00070182 TCONS\_00030794 TCONS\_00036872 TCONS\_00068140

TCONS\_00011369 TCONS\_00015411 TCONS\_00062405 TCONS\_00090127 TCONS\_00019428 TCONS\_00010009 TCONS\_00061570 TCONS\_00046210 TCONS\_00011242

TCONS\_00089357 TCONS\_00090173 TCONS\_00003198 TCONS\_00078349 TCONS\_00015056 TCONS\_00084740 TCONS\_00050853 TCONS\_00023745 TCONS\_00024627

TCONS\_00041409 TCONS\_00065313 TCONS\_00070183 TCONS\_00024792 TCONS\_00047772 TCONS\_00053354 TCONS\_00090322 TCONS\_00082758 TCONS\_00079037

TCONS\_00000647 TCONS\_00014921 TCONS\_00082531 TCONS\_00033473 TCONS\_00072484 TCONS\_00018258 TCONS\_00031308 TCONS\_00064000 TCONS\_00075526

TCONS\_00023672 TCONS\_00058537 TCONS\_00035457 TCONS\_00030573 TCONS\_00031307 TCONS\_00030244 TCONS\_00026088 TCONS\_00013393 TCONS\_00070806

TCONS\_00031277 TCONS\_00013595 TCONS\_00082964 TCONS\_00028830 TCONS\_00056825 TCONS\_00090289 TCONS\_00080980 TCONS\_00071179 TCONS\_00018257

TCONS\_00014934 TCONS\_00030759 TCONS\_00082829 TCONS\_00009842 TCONS\_00050852 TCONS\_00058622 TCONS\_00006975 TCONS\_00021413 TCONS\_00024769

TCONS\_00006360 TCONS\_00025343 TCONS\_00082963 TCONS\_00072657 TCONS\_00060176 TCONS\_00030715 TCONS\_00064302 TCONS\_00064652 TCONS\_00024550

TCONS\_00091188 TCONS\_00079038 TCONS\_00028598 TCONS\_00033827 TCONS\_00050698 TCONS\_00005320 TCONS\_00081800 TCONS\_00069271 TCONS\_00088279

TCONS\_00030272 TCONS\_00005319 TCONS\_00081928 TCONS\_00062612 TCONS\_00059364 TCONS\_00091823 TCONS\_00091824 TCONS\_00052374 TCONS\_00088633

TCONS\_00052380 TCONS\_00016477 TCONS\_00077483 TCONS\_00025949 TCONS\_00030271 TCONS\_00008866 TCONS\_00018140 TCONS\_00055539 TCONS\_00010896

TCONS\_00024820 TCONS\_00036685 TCONS\_00081801 TCONS\_00001199 TCONS\_00008906 TCONS\_00014427 TCONS\_00050697 TCONS\_00053015 TCONS\_00062502

TCONS\_00058439 TCONS\_00021614 TCONS\_00012209 TCONS\_00007442 TCONS\_00015081 TCONS\_00010226 TCONS\_00053119 TCONS\_00035458 TCONS\_00006993

TCONS\_00077842 TCONS\_00077813 TCONS\_00045383 TCONS\_00080981 TCONS\_00070662 TCONS\_00006359 TCONS\_00027553 TCONS\_00026124 TCONS\_00015725

TCONS\_00056439 TCONS\_00086675 TCONS\_00079245 TCONS\_00070844 TCONS\_00083791 TCONS\_00031547 TCONS\_00015784 TCONS\_00023064 TCONS\_00023065

TCONS\_00056362 TCONS\_00025501 TCONS\_00081929 TCONS\_00003219 TCONS\_00079276 TCONS\_00005631 TCONS\_00024768 TCONS\_00012162 TCONS\_00007198

TCONS\_00058353 TCONS\_00019521 TCONS\_00054374 TCONS\_00013264 TCONS\_00063224 TCONS\_00044865 TCONS\_00082635 TCONS\_00005060 TCONS\_00005061

TCONS\_00005062 TCONS\_00004806 TCONS\_00055292 TCONS\_00043214 TCONS\_00032847 TCONS\_00088717 TCONS\_00008469 TCONS\_00060580 TCONS\_00060579

TCONS\_00053441 TCONS\_00034831 TCONS\_00067102 TCONS\_00068188 TCONS\_00014608 TCONS\_00058244 TCONS\_00002551 TCONS\_00018141 TCONS\_00042828

TCONS\_00003061 TCONS\_00077841 TCONS\_00006216 TCONS\_00002864 TCONS\_00054381 TCONS\_00057329 TCONS\_00067777 TCONS\_00058245 TCONS\_00015455

TCONS\_00072477 TCONS\_00091879 TCONS\_00086380 TCONS\_00046507 TCONS\_00042891 TCONS\_00087602 TCONS\_00013807 TCONS\_00031546 TCONS\_00054383

TCONS\_00016058 TCONS\_00025406 TCONS\_00069228 TCONS\_00053504 TCONS\_00033987 TCONS\_00019940 TCONS\_00042182 TCONS\_00044866 TCONS\_00054422

TCONS\_00058908 TCONS\_00014591 TCONS\_00090287 TCONS\_00079043 TCONS\_00065217 TCONS\_00090728 TCONS\_00090729 TCONS\_00079236 TCONS\_00056508

TCONS\_00020004 TCONS\_00024694 TCONS\_00040243 TCONS\_00062595 TCONS\_00014978 TCONS\_00048034 TCONS\_00031402 TCONS\_00045857 TCONS\_00046508

TCONS\_00009675 TCONS\_00035106 TCONS\_00053355 TCONS\_00035105 TCONS\_00034077 TCONS\_00003348 TCONS\_00013174 TCONS\_00087363 TCONS\_00003347

TCONS\_00001200 TCONS\_00052504 TCONS\_00033828 TCONS\_00052244 TCONS\_00070600 TCONS\_00078943 TCONS\_00030933 TCONS\_00012282 TCONS\_00061540

TCONS\_00052309 TCONS\_00007592 TCONS\_00077474 TCONS\_00069496 TCONS\_00032845 TCONS\_00078695 TCONS\_00078576 TCONS\_00035235 TCONS\_00034262

TCONS\_00079042 TCONS\_00049077 TCONS\_00050584 TCONS\_00010769 TCONS\_00010770 TCONS\_00034663 TCONS\_00068716 TCONS\_00057932 TCONS\_00042596

TCONS\_00087107 TCONS\_00025387 TCONS\_00091187 TCONS\_00080472 TCONS\_00040674 TCONS\_00046914 TCONS\_00004470 TCONS\_00062549 TCONS\_00011643

TCONS\_00036129 TCONS\_00054338 TCONS\_00081912 TCONS\_00083246 TCONS\_00088658 TCONS\_00024638 TCONS\_00078942 TCONS\_00031114 TCONS\_00012751

TCONS\_00030932 TCONS\_00070245 TCONS\_00074850 TCONS\_00061755 TCONS\_00078389 TCONS\_00004503 TCONS\_00012032 TCONS\_00031686 TCONS\_00048979

TCONS\_00090286 TCONS\_00090926 TCONS\_00007889 TCONS\_00019924 TCONS\_00078154 TCONS\_00029049 TCONS\_00049230 TCONS\_00020979 TCONS\_00034263

TCONS\_00073544 TCONS\_00063372 TCONS\_00052258 TCONS\_00044336 TCONS\_00089588 TCONS\_00020592 TCONS\_00078153 TCONS\_00010156 TCONS\_00009166

TCONS\_00044337 TCONS\_00016857 TCONS\_00065055 TCONS\_00063277 TCONS\_00077475 TCONS\_00052199 TCONS\_00033554 TCONS\_00042458 TCONS\_00043215

TCONS\_00065469 TCONS\_00078415 TCONS\_00020967 TCONS\_00031249 TCONS\_00031865 TCONS\_00013828 TCONS\_00021638 TCONS\_00046599 TCONS\_00012163

TCONS\_00012161 TCONS\_00036619 TCONS\_00003410 TCONS\_00072887 TCONS\_00072202 TCONS\_00067053 TCONS\_00026436 TCONS\_00065342 TCONS\_00086992

TCONS\_00069805 TCONS\_00009168 TCONS\_00077473 TCONS\_00080378 TCONS\_00024560 TCONS\_00034728 TCONS\_00050510 TCONS\_00050511 TCONS\_00079360

TCONS\_00050719 TCONS\_00074849 TCONS\_00042665 TCONS\_00018888 TCONS\_00064001 TCONS\_00080995 TCONS\_00089670 TCONS\_00053929 TCONS\_00054318

TCONS\_00008053 TCONS\_00081422 TCONS\_00054317 TCONS\_00018889 TCONS\_00014389 TCONS\_00019097 TCONS\_00083054 TCONS\_00073554 TCONS\_00078689

TCONS\_00052373 TCONS\_00080554 TCONS\_00021732 TCONS\_00053944 TCONS\_00037745 TCONS\_00017614 TCONS\_00082099 TCONS\_00007227 TCONS\_00071841

TCONS\_00080370 TCONS\_00012543 TCONS\_00086393 TCONS\_00089311 TCONS\_00065244 TCONS\_00042180 TCONS\_00042181 TCONS\_00022690 TCONS\_00021169

TCONS\_00080470 TCONS\_00008052 TCONS\_00046347 TCONS\_00061754 TCONS\_00060820 TCONS\_00028459 TCONS\_00089008 TCONS\_00041390 TCONS\_00087818

TCONS\_00039989 TCONS\_00045089 TCONS\_00044561 TCONS\_00086880 TCONS\_00012692 TCONS\_00012693 TCONS\_00031118 TCONS\_00031685 TCONS\_00089416

TCONS\_00078636 TCONS\_00008807 TCONS\_00081674 TCONS\_00063278 TCONS\_00052375 TCONS\_00073275 TCONS\_00040843 TCONS\_00020179 TCONS\_00089356

TCONS\_00081916 TCONS\_00073553 TCONS\_00013601 TCONS\_00052896 TCONS\_00033343 TCONS\_00048144 TCONS\_00088430 TCONS\_00079273 TCONS\_00045926

TCONS\_00029230 TCONS\_00080330 TCONS\_00080377 TCONS\_00011610 TCONS\_00004463 TCONS\_00005305 TCONS\_00002644 TCONS\_00070842 TCONS\_00061285

TCONS\_00070841 TCONS\_00046287 TCONS\_00024617 TCONS\_00076291 TCONS\_00001333 TCONS\_00001334 TCONS\_00007890 TCONS\_00086894 TCONS\_00083114

TCONS\_00053011 TCONS\_00020696 TCONS\_00061002 TCONS\_00057779 TCONS\_00064034 TCONS\_00087318 TCONS\_00054861 TCONS\_00061003 TCONS\_00021883

TCONS\_00058797 TCONS\_00027644 TCONS\_00047542 TCONS\_00005178 TCONS\_00021622 TCONS\_00033506 TCONS\_00034653 TCONS\_00051311 TCONS\_00080211

TCONS\_00086468 TCONS\_00087959 TCONS\_00052377 TCONS\_00072030 TCONS\_00069270 TCONS\_00005611 TCONS\_00083359 TCONS\_00083360 TCONS\_00080475

TCONS\_00011176 TCONS\_00079677 TCONS\_00000501 TCONS\_00015082 TCONS\_00072472 TCONS\_00072473 TCONS\_00049455 TCONS\_00090836 TCONS\_00078701

TCONS\_00056134 TCONS\_00004962 TCONS\_00065215 TCONS\_00088845 TCONS\_00086726 TCONS\_00057786 TCONS\_00059352 TCONS\_00002503 TCONS\_00011582

TCONS\_00018714 TCONS\_00080209 TCONS\_00082007 TCONS\_00050720 TCONS\_00052949 TCONS\_00083838 TCONS\_00048143 TCONS\_00007555 TCONS\_00081685

TCONS\_00043713 TCONS\_00075360 TCONS\_00089587 TCONS\_00069015 TCONS\_00086291 TCONS\_00073295 TCONS\_00079465 TCONS\_00071144 TCONS\_00070297

TCONS\_00074125 TCONS\_00004500 TCONS\_00084812 TCONS\_00008054 TCONS\_00011376 TCONS\_00086469 TCONS\_00088170 TCONS\_00003407 TCONS\_00081416

TCONS\_00091062 TCONS\_00020077 TCONS\_00084826 TCONS\_00024540 TCONS\_00010709 TCONS\_00086734 TCONS\_00036322 TCONS\_00061318 TCONS\_00074088

TCONS\_00010670 TCONS\_00021733 TCONS\_00051675 TCONS\_00057788 TCONS\_00033558 TCONS\_00013602 TCONS\_00067218 TCONS\_00033342 TCONS\_00084801

TCONS\_00046004 TCONS\_00052874 TCONS\_00012544 TCONS\_00021528 TCONS\_00021989 TCONS\_00033511 TCONS\_00046901 TCONS\_00078381 TCONS\_00033942

TCONS\_00077818 TCONS\_00082407 TCONS\_00080474 TCONS\_00078694 TCONS\_00042698 TCONS\_00082570 TCONS\_00069016 TCONS\_00002698 TCONS\_00020698

TCONS\_00053945 TCONS\_00000362 TCONS\_00074096 TCONS\_00002448 TCONS\_00012538 TCONS\_00089537 TCONS\_00090296 TCONS\_00090175 TCONS\_00031446

TCONS\_00012539 TCONS\_00012395 TCONS\_00027751 TCONS\_00030746 TCONS\_00064438 TCONS\_00081417 TCONS\_00089202 TCONS\_00002502 TCONS\_00022295

TCONS\_00019925 TCONS\_00084795 TCONS\_00056821 TCONS\_00042814 TCONS\_00042815 TCONS\_00056826 TCONS\_00000500 TCONS\_00041406 TCONS\_00014731

TCONS\_00030438 TCONS\_00010847 TCONS\_00010671 TCONS\_00029407 TCONS\_00088641 TCONS\_00029408 TCONS\_00032362 TCONS\_00064851 TCONS\_00029517

TCONS\_00015892 TCONS\_00007101 TCONS\_00042401 TCONS\_00042611 TCONS\_00091862 TCONS\_00056680 TCONS\_00080369 TCONS\_00029410 TCONS\_00064159

TCONS\_00065181 TCONS\_00021631 TCONS\_00090879 TCONS\_00041456 TCONS\_00029411 TCONS\_00057445 TCONS\_00071934 TCONS\_00049147 TCONS\_00011978

TCONS\_00038094 TCONS\_00041455 TCONS\_00042696 TCONS\_00045127 TCONS\_00014732 TCONS\_00011229 TCONS\_00002454 TCONS\_00068271 TCONS\_00068272

TCONS\_00079352 TCONS\_00039462 TCONS\_00005081 TCONS\_00034095 TCONS\_00087855 TCONS\_00080207 TCONS\_00084741 TCONS\_00012104 TCONS\_00056823

TCONS\_00002684 TCONS\_00015292 TCONS\_00048978 TCONS\_00051308 TCONS\_00054192 TCONS\_00057126 TCONS\_00057127 TCONS\_00065399 TCONS\_00088168

TCONS\_00003409 TCONS\_00084742 TCONS\_00071933 TCONS\_00083199 TCONS\_00074827 TCONS\_00067776 TCONS\_00064850 TCONS\_00030035 TCONS\_00018674
